# Supplementary material for: Effects of a mindfulness-based and acceptance-based group programme followed by physical activity for patients with fibromyalgia: a randomised controlled trial
Source: PubMed Central journal article supplement — BMJ Open. 2021 Jun 29;11(6):e046943. doi: 10.1136/bmjopen-2020-046943 (PMC8245472; doi:10.1136/bmjopen-2020-046943), 2021-06-29
Supplement: bmjopen-2020-046943.draft_revisions.pdf [file bmjopen-2020-046943.draft_revisions.pdf]

# BMJ Open

BMJ Open is committed to open peer review. As part of this commitment we make the peer review history of every article we publish publicly available.

When an article is published we post the peer reviewers' comments and the authors' responses online. We also post the versions of the paper that were used during peer review. These are the versions that the peer review comments apply to.

The versions of the paper that follow are the versions that were submitted during the peer review process. They are not the versions of record or the final published versions. They should not be cited or distributed as the published version of this manuscript.

BMJ Open is an open access journal and the full, final, typeset and author-corrected version of record of the manuscript is available on our site with no access controls, subscription charges or pay-per-view fees (<http://bmjopen.bmj.com>).

If you have any questions on BMJ Open's open peer review process please email [info.bmjopen@bmj.com](mailto:info.bmjopen@bmj.com)

# BMJ Open

## Effects of a mindfulness- and acceptance-based group-programme followed by physical activity for patients with fibromyalgia: a randomised controlled trial

|                               |                                                                                                                                                                                                                                                                                                                                                                                                                                                                |
|-------------------------------|----------------------------------------------------------------------------------------------------------------------------------------------------------------------------------------------------------------------------------------------------------------------------------------------------------------------------------------------------------------------------------------------------------------------------------------------------------------|
| Journal:                      | <i>BMJ Open</i>                                                                                                                                                                                                                                                                                                                                                                                                                                                |
| Manuscript ID                 | bmjopen-2020-046943                                                                                                                                                                                                                                                                                                                                                                                                                                            |
| Article Type:                 | Original research                                                                                                                                                                                                                                                                                                                                                                                                                                              |
| Date Submitted by the Author: | 13-Nov-2020                                                                                                                                                                                                                                                                                                                                                                                                                                                    |
| Complete List of Authors:     | Haugmark, Trond; Diakonhjemmet Sykehus AS, Department of Rheumatology: National Advisory Unit on Rehabilitation in Rheumatology Hagen, Kåre; Folkehelseinstituttet<br>Provan, Sella; Diakonhjemmet Sykehus AS, Department of Rheumatology<br>Smedslund, Geir; Folkehelseinstituttet<br>Zangi, Heidi; Diakonhjemmet Sykehus AS, National Advisory Unit on Rehabilitation in Rheumatology, Rheumatological Dept.; VID Vitenskapelige Hogskole, Faculty of Health |
| Keywords:                     | RHEUMATOLOGY, REHABILITATION MEDICINE, PRIMARY CARE                                                                                                                                                                                                                                                                                                                                                                                                            |
|                               |                                                                                                                                                                                                                                                                                                                                                                                                                                                                |

SCHOLARONE™  
Manuscripts

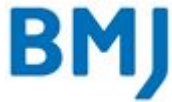

I, the Submitting Author has the right to grant and does grant on behalf of all authors of the Work (as defined in the below author licence), an exclusive licence and/or a non-exclusive licence for contributions from authors who are: i) UK Crown employees; ii) where BMJ has agreed a CC-BY licence shall apply, and/or iii) in accordance with the terms applicable for US Federal Government officers or employees acting as part of their official duties; on a worldwide, perpetual, irrevocable, royalty-free basis to BMJ Publishing Group Ltd ("BMJ") its licensees and where the relevant Journal is co-owned by BMJ to the co-owners of the Journal, to publish the Work in this journal and any other BMJ products and to exploit all rights, as set out in our [licence](#).

The Submitting Author accepts and understands that any supply made under these terms is made by BMJ to the Submitting Author unless you are acting as an employee on behalf of your employer or a postgraduate student of an affiliated institution which is paying any applicable article publishing charge ("APC") for Open Access articles. Where the Submitting Author wishes to make the Work available on an Open Access basis (and intends to pay the relevant APC), the terms of reuse of such Open Access shall be governed by a Creative Commons licence – details of these licences and which [Creative Commons](#) licence will apply to this Work are set out in our licence referred to above.

Other than as permitted in any relevant BMJ Author's Self Archiving Policies, I confirm this Work has not been accepted for publication elsewhere, is not being considered for publication elsewhere and does not duplicate material already published. I confirm all authors consent to publication of this Work and authorise the granting of this licence.

1  
2  
3 **Effects of a mindfulness- and acceptance-based group-programme followed by physical**  
4 **activity for patients with fibromyalgia: a randomised controlled trial**  
5  
6  
7  
8  
9  
10

11 Trond Haugmark<sup>1,2</sup>, Kåre Birger Hagen<sup>1,3</sup>, Sella Aarrestad Provan<sup>1</sup>, Geir Smedslund<sup>1,3</sup>, Heidi  
12 A. Zangi<sup>1,4</sup>  
13  
14  
15

16  
17 **Author details**  
18  
19

20 <sup>1</sup>Department of Rheumatology, National Advisory Unit on Rehabilitation in Rheumatology,  
21 Diakonhjemmet Hospital, Oslo, Norway  
22  
23

24  
25 <sup>2</sup>Faculty of Medicine, Institute of Health and Society, University of Oslo, Norway  
26  
27

28  
29 <sup>3</sup>Division of Health Services, Norwegian Institute of Public Health, Oslo, Norway  
30  
31

32 <sup>4</sup>Faculty of Health, VID Specialized University, Oslo, Norway  
33  
34  
35  
36

37 **Corresponding author**  
38  
39

40 Trond Haugmark, Department of Rheumatology, National Advisory Unit on Rehabilitation in  
41 Rheumatology, Diakonhjemmet Hospital, PO Box 23 Vinderen, N-0319 Oslo, Norway  
42  
43  
44

45 Phone number: +47 95130795  
46  
47

48 E-mail: [trond.haugmark@diakonsyk.no](mailto:trond.haugmark@diakonsyk.no)  
49  
50  
51

52 **Keywords:** fibromyalgia, rehabilitation, primary health care, mindfulness- and acceptance-  
53 based interventions, physical activity, health promotion  
54  
55  
56

57 **Word count: 4153**  
58  
59  
60

## Abstract

**Introduction:** Non-pharmacological approaches are recommended as first-line treatment for patients with fibromyalgia. This randomised controlled trial investigated the effects of a multicomponent rehabilitation programme for patients with recently diagnosed fibromyalgia in primary and secondary health care.

**Methods:** Patients with widespread pain  $\geq 3$  months were referred to rheumatologists for diagnostic clarification and assessment of study eligibility. Inclusion criteria were age 20 to 50, engaged in work or studies at present or during the past two years, and fibromyalgia diagnosed according to ACR 2010 criteria. All eligible patients participated in a short patient education programme before inclusion and randomisation. The multicomponent programme, a 10-session mindfulness- and acceptance-based group programme followed by 12 weeks supervised physical exercise was evaluated in comparison to treatment as usual. The primary outcome was the Patient Global Impression of Change (PGIC). Secondary outcomes were self-reported pain, fatigue, sleep quality, psychological distress, physical activity, health related quality of life and work ability at 12-month follow-up.

**Results:** In total, 170 patients were randomised, 1:1, intervention:control. Overall, the multicomponent rehabilitation programme was not more effective than treatment as usual; 13% in the intervention group and 8% in the control group reported clinically relevant improvement in PGIC ( $p=0.28$ ). No statistically significant between-group differences were found in any disease-related secondary outcomes. There were significant between-group differences in patient's tendency to be mindful ( $p=0.016$ ) and perceived benefits of exercise ( $p=0.033$ ) in favour of the intervention group.

**Conclusions:** A multicomponent rehabilitation programme combining patient education with a mindfulness- and acceptance-based group-programme followed by supervised physical

1  
2  
3 activity was not more effective than patient education and treatment as usual for patients with  
4  
5 recently diagnosed fibromyalgia at 12-month follow-up.  
6  
7

8 **Trial registration:** The trial is registered at BMC ISRCTN96836577.  
9

## 10 11 **Article Summary**

### 12 13 14 **Strengths and limitations of this study**

- 15  
16  
17 • This pragmatic randomised controlled trial was conducted according to a predefined  
18  
19 published protocol.
- 20  
21  
22 • The main treatment effects were analysed on an intention-to-treat basis at 12 months  
23  
24 follow-up, with all randomised patients retaining their original allocated groups.
- 25  
26  
27 • Although we intended to capture patients with FM at an early stage of their disease,  
28  
29 the included patients reported median symptoms duration of eight years.
- 30  
31  
32 • There was a high drop-out rate from the physical activity intervention.
- 33  
34  
35 • We did not monitor the content of ‘treatment as usual’ in the control group other than  
36  
37 physical activity.

### 38 39 **Protocol**

40  
41  
42 A published protocol article can be found at <https://bmjopen.bmj.com/content/8/6/e021004>  
43  
44  
45  
46  
47  
48  
49  
50  
51  
52  
53  
54  
55  
56  
57  
58  
59  
60

## Introduction

Fibromyalgia (FM) is characterised by widespread pain and symptoms such as fatigue, unrefreshed sleep, mood disturbances and cognitive impairment that have persisted more than three months without any alternative explanation (1). Patients report unpredictable symptoms that vary in terms of expression and intensity, and reduced quality of life (2-5). The estimated prevalence of FM in the general population worldwide is between 2% and 7%, with women being predominantly affected (6). Many patients experience lack of understanding from their primary care physicians, insufficient health care, and deficient treatment (7, 8).

For optimal management of FM, the European League Against Rheumatism (EULAR) recommends prompt diagnosis and patient education as first-line treatment. The effects of pharmacological treatments are inadequate (4). The management should aim at improving patients' health-related quality of life and initially focus on non-pharmacological modalities (4, 9). Individualised physical exercise is recommended for all patients with FM. Cognitive behavioural therapy, mindfulness-based stress reduction, meditative movement (i.e. qigong, yoga, tai chi), and hydrotherapy have shown promising effects for some patients, although the evidence is still insufficient (4). Further, multicomponent programmes combining physical exercise with either of these modalities have shown beneficial synergetic effects on FM symptoms in terms of reduced pain and FM impact, and increased physical fitness at the end of treatment (4, 10).

Three recent systematic reviews and meta-analyses have shown that mindfulness- and acceptance-based interventions had short-term small to moderate effects on pain, depression, anxiety, sleep quality and health-related quality of life in patients with FM (11-13). Systematic reviews and meta-analyses on physical exercise in patients with FM have shown beneficial effects on symptoms, such as pain, sleep, and physical function (14-18).

1  
2  
3 A Norwegian mindfulness- and acceptance-based intervention, the Vitality Training  
4 Programme (VTP), aimed at strengthening participants health-promoting resources and ability  
5 to make choices in accordance with own values, has been evaluated in two randomised  
6 controlled trials in persons with chronic musculoskeletal pain and inflammatory arthritis (IA).  
7  
8 The VTP improved pain, fatigue, psychological distress, pain coping, and self-efficacy for  
9 pain and other symptoms (19, 20). The effects persisted at 12-month follow-up in both  
10 studies. However, a preceding longitudinal pre-post-test study on the VTP in patients with IA  
11 and FM showed substantial improvements in patients with IA, but no changes in patients with  
12 FM (21). In a nested qualitative study, the FM patients described how they had struggled for  
13 years to be believed and taken seriously (22). The authors suggested that the lack of effects in  
14 patients with FM might have been related to long symptoms duration without recognition and  
15 treatment, which may have led to the development of maladaptive patterns of coping  
16 strategies that are difficult to change. They proposed that future studies should investigate the  
17 effects of the VTP in FM patients at an early stage of their disease.  
18  
19  
20  
21  
22  
23  
24  
25  
26  
27  
28  
29  
30  
31  
32  
33  
34  
35

36 The aim of the present randomised controlled trial was to study the effects of a  
37 community-based multicomponent rehabilitation programme comprising the VTP followed  
38 by 12 weeks of physical activity counselling in patients with recently diagnosed FM. More  
39 specifically, we examined whether the multicomponent rehabilitation programme improved  
40 patients' self-perceived health, pain, fatigue, sleep quality, psychological distress, physical  
41 activity and work ability, compared to treatment as usual.  
42  
43  
44  
45  
46  
47  
48  
49  
50  
51  
52  
53  
54  
55  
56  
57  
58  
59  
60



## Methods

### *Study design*

We conducted a two-armed parallel randomised controlled trial in rural and urban communities in the South-Eastern part of Norway. Patients were allocated to the VTP and physical activity (intervention group) or treatment as usual (control group). More details can be found in the published protocol (ISRCTN 96836577) (23). We followed the Consolidated Standards of Reporting Trials (CONSORT) in this report (24, 25).

### *Participants*

General practitioners and physiotherapists referred patients who had widespread pain that had lasted for at least three months to rheumatologists in specialist health care for diagnostic clarification and assessment of study eligibility. Inclusion criteria were age 20 to 50 and FM diagnosed according to the American College of Rheumatology (ACR) 2010 criteria (1, 26). Patients were excluded if they had an inflammatory rheumatic disease, had a severe psychiatric disorder, another disease that did not allow physical activity, or if they were unable to understand or write Norwegian. We also excluded patients who had been out of work for more than two years.

### *Procedure and interventions*

All eligible patients received a three-hour patient education programme and oral information about the study. Patients who agreed to participate completed written informed consent before inclusion. The VTP was organised in the local communities with seven to 12 patients in each group. It comprised ten weekly four-hour sessions plus a booster session after approximately six months. Every session addressed a specific topic: If my body could talk/ Who am I?/ My resources and potentials/ Values—what is important to me?/ What do I need?/ Strengths and limitations/ Bad conscience/ Anger/ Joy/ Resources, potentials and choices/ Closure and the way ahead. These were explored by various creative methods, such as guided imagery,

1  
2  
3 music, drawing, poetry, metaphors and reflections. The patients wrote logs after all exercises  
4  
5 and shared their experiences with other group participants.  
6

7  
8 Moreover, patients were invited to attend mindfulness meditation, i.e. body scan, sitting and  
9  
10 walking meditation, and gentle yoga exercises (27). They were encouraged to listen to guided  
11  
12 mindfulness meditation audio files and practice awareness in their daily activities between  
13  
14 sessions (28). The group facilitators were experienced nurses and physiotherapists, who were  
15  
16 certified by a one-year post-graduate training programme (30 credits). The facilitators  
17  
18 followed a standardised manual with a thorough programme description and monitored the  
19  
20 attendance throughout the programme. Based on previous studies, the patients needed to  
21  
22 attend at least five sessions to expect effect (20, 23). Supplementary file 1 describes an  
23  
24 example of the structure and content of one of the sessions.  
25  
26  
27

28  
29 The supervised physical exercise was conducted at a Healthy Life Centre (HLC),  
30  
31 which is a low threshold health care service provided in Norwegian communities designed as  
32  
33 easily accessible generic services aimed at lifestyle changes. HLCs typically offer a 12-week  
34  
35 programme during daytime, comprising individual counselling based on Motivational  
36  
37 Interviewing (MI), individual and group physical activities (29). A physiotherapist provided  
38  
39 the individual physical activity counselling. This intervention aimed at helping patients to set  
40  
41 tailored goals, identifying and overcoming barriers to physical activity, and guiding them into  
42  
43 exercises that they could continue after the 12-week period to increase the level of physical  
44  
45 activity gradually.  
46  
47  
48  
49

50  
51 Control group patients did not receive any organised intervention other than diagnostic  
52  
53 clarification and the patient education session but were free to attend any treatment and  
54  
55 activity at their own initiative. The control group was offered the VTP and the HLC  
56  
57 intervention after completion of the data collection at 12-month follow-up.  
58  
59  
60

### *Outcomes*

The outcome measures were selected according to a core set of domains for FM defined by the Outcome Measures in Rheumatology Clinical Trials (OMERACT) (30, 31). Self-reported questionnaires comprising baseline demographics and all outcome measures were collected electronically before randomisation (baseline), after the VTP (three months) and at 12 months from baseline.

#### *Primary outcome: Patient Global Impression of Change (PGIC)*

PGIC is a validated ordinal seven-point self-reported scale that measures how patients feel that their health has changed from they entered the trial to post-intervention data collections. The scale ranges from 1 (I feel very much worse) through 4 (no change) to 7 (I feel very much better) (32). Scores 6 and 7 are considered a clinically relevant improvement. Patient Global Impression of Change (PGIC) has previously been used in FM trials and is recommended as a core measure to improve the applicability of information from clinical trials to clinical practice (33-35). Higher scores in PGIC has been associated with more significant improvements in key FM symptoms and correlates well with FM outcomes (33). The scores can be dichotomised into 'Less than much better' (scores 1 to 5) and 'Much better' (scores 6 and 7) (34).

#### *Secondary outcomes*

Pain, fatigue, and sleep quality were assessed by Numerical Rating Scales (NRS) scored from 0 to 10 (10 is intolerable pain/ fatigue/ very bad sleep) (31). Psychological distress was assessed by the General Health Questionnaire-12 (GHQ-12) that comprises six positively phrased items indicating psychological health and six negatively phrased items indicating psychological distress (36). The respondents scored their condition during the last two weeks compared to what they perceived as their 'normal' condition on a four-point Likert scale, reported from 0 (less than usual) to 3 (much more than usual). The scale was reversed for

1  
2  
3 negatively phrased items. Data were analysed and reported as mean sum score; higher scores  
4 represented higher psychological distress (37, 38). A general tendency to be mindful in daily  
5 life situations was assessed by the Five Facet Mindfulness Questionnaire (FFMQ) that  
6 comprises 39 items rated on a five-point Likert scale from 1 (never true) to 5 (always true)  
7 (39). Higher scores reflected higher levels of mindfulness. The scale was reversed for  
8 negatively phrased items. Data were analysed and reported as a mean sum score, comprising  
9 all five facets. Physical activity (PA) was assessed by three questions from the Nord-  
10 Trøndelag Health Study (HUNT1) (40). The questions measure frequency, intensity and  
11 duration of leisure-time physical exercises such as walking, skiing, swimming or other  
12 training/-sport activities that improve physical fitness. A summary index of weekly PA was  
13 calculated from the frequency, intensity and duration scales with scores from 0 to 15. Higher  
14 scores indicate increased PA. Motivation and barriers for physical activity were assessed by  
15 the Exercise Beliefs and Exercise Habits questionnaire comprising 20 items scored on a five-  
16 point Likert scale ranging from 'strongly agree' to 'strongly disagree' (41). The items were  
17 divided into four sub-scales calculated and reported separately as beliefs about one's ability to  
18 exercise, barriers to exercise, benefits of exercise, and impact of exercise on muscular pain.  
19 Work ability was assessed by the Work Productivity and Activity Impairment General Health  
20 V2.1 (WPAI:GH) comprising six questions to determine employment status; hours missed  
21 from work because of health problems or other reasons, and hours worked (42). Higher scores  
22 indicate more significant impairment and less productivity. For this study, we calculated the  
23 outcomes 'overall work impairment' and 'daily activity impairment'. Health-related quality of  
24 life was assessed with EuroQol (EQ-5D-5L) comprising five dimensions; mobility, self-care,  
25 usual activities, pain/discomfort and anxiety/depression scored on five levels: no problems,  
26 slight problems, moderate problems, severe problems, and extreme problems. The EQ-5D-5L  
27 scores range between 0–1, 0 indicates death, and 1 indicates perfect health (43). Secondly,  
28  
29  
30  
31  
32  
33  
34  
35  
36  
37  
38  
39  
40  
41  
42  
43  
44  
45  
46  
47  
48  
49  
50  
51  
52  
53  
54  
55  
56  
57  
58  
59  
60

1  
2  
3 the participants rate their overall health on a 0 - 100 hash-marked, vertical visual analogue  
4 scale (EQ-VAS), 0 is as bad as it could be, and 100 as good as it could be (44).  
5  
6  
7

### 8 *Harms*

9  
10 Patients were asked to report adverse events at 12 months and major symptoms that were  
11 associated with these events.  
12  
13  
14

### 15 *Randomisation and blinding*

16  
17 A statistician generated an electronic randomisation list for each geographical area to ensure  
18 approximately equal sample sizes. A research assistant not involved in the study generated the  
19 allocation sequence and assigned patients to study groups. Further, the facilitators of the VTP  
20 groups organised and administered the enrolment. Due to the nature of the intervention, it was  
21 not possible to blind the patients and the VTP facilitators to group allocation. The project  
22 leader and the research coordinator who were responsible for the data collection and data  
23 analysis were blinded to the allocation.  
24  
25  
26  
27  
28  
29  
30  
31  
32  
33  
34  
35

### 36 *Sample size*

37  
38 Sample size calculation was based on the primary outcome assuming that 10% in the control  
39 group would report clinically relevant improvement at 12 months follow-up, and that at least  
40 20% absolute difference in improvement rate between the groups would be considered a  
41 minimum clinically relevant difference. With allowance for 10% losses to follow-up, 70  
42 patients in each group were needed to have at least 80% power of detecting differences with  
43 5% alpha level.  
44  
45  
46  
47  
48  
49  
50  
51

### 52 *Statistical analyses*

53  
54 Mean values and standard deviation (SD) were calculated for continuous variables or as  
55 median with minimum and maximum values if skewed. Frequency numbers and percentages  
56 were calculated for categorical variables. Baseline differences in patients' characteristics  
57  
58  
59  
60

1  
2  
3 between intervention and control group were assessed by independent group t-test or Mann  
4  
5  
6  
7  
8  
9  
10  
11  
12  
13  
14  
15  
16  
17  
18  
19  
20  
21  
22  
23  
24  
25  
26  
27  
28  
29  
30  
31  
32  
33  
34  
35  
36  
37  
38  
39  
40  
41  
42  
43  
44  
45  
46  
47  
48  
49  
50  
51  
52  
53  
54  
55  
56  
57  
58  
59  
60

between intervention and control group were assessed by independent group t-test or Mann  
Whitney U test for continuous variables. For categorical variables, we used Pearson's Chi-  
square test or Fisher's exact test when the expected cell count fell below five. The treatment  
effects were analysed on an intention-to-treat basis with all randomised patients retaining their  
original allocated groups at 12 months. The distribution of the primary outcome (PGIC) was  
analysed as an ordinal variable by Mann Whitney U test. When dichotomised, the difference  
between groups was tested with Chi-square statistics and Fisher's exact tests. Treatment  
effects in secondary outcomes were estimated by Analysis of Covariance (ANCOVA) at three  
and 12-month follow-up adjusted for the baseline values. The level of statistical significance  
was set to  $\leq 0.05$ . We used STATA V.14.0 (45) to analyse the data. Missing values in single  
items of FFMQ and GHQ-12 were imputed by calculating the mean value of the registered  
values multiplied with the number of questions.

### *Patient and public involvement*

Representatives from the Patient Advisory Board at the Diakonhjemmet Hospital were  
involved in the development of the study, such as study design, research questions and  
recruitment of patients. The electronic questionnaires were tested and amended by user  
representatives. More information is described elsewhere (23).

## Results

Of the 289 patients who were referred to the rheumatologists, 208 (72%) were eligible for inclusion. A total of 170 consented to participate and were randomised; 85 to the intervention group and 85 to the control group. Figure 1 illustrates the flow of patients through the study.

### Figure 1. Flow chart of patients

The intervention group had a slightly higher median age and symptoms duration in years compared to the control group. All other baseline characteristics were equally distributed between the groups (Table 1).

### Table 1. Patients' characteristics at baseline

Of the 75 patients who attended the VTP, 67 (89%) completed five sessions or more; 21 (31%) of these patients completed all ten sessions, 20 (30%) completed nine, and nine (13%) completed eight sessions. The average attendance rate was 7.5 sessions. Thirty-two patients (43%) attended the physical activity intervention after the VTP, but only a few completed the 12-week programme. The data collection was completed by 160 (94%) at three months and 153 (90%), and 12 months. Recruitment of patients started in September 2016 and ended in August 2018. Electronic data collection started in February 2017 and ended in September 2019 when the complete 12-month follow-up data were attained.

### *Patient Global Impression of Change*

We found statistically significant differences between groups in distribution of the PGIC-scores at three-month follow up ( $p=0.01$ ), but not at 12-month follow up ( $p=0.06$ ). The distribution across all response categories is shown in Figure 2.

#### **Figure 2. The distribution of PGIC scores**

There were no statistically significant differences between the intervention group and the control group at three- and 12-month follow-ups when the PGIC was dichotomised into 'Less than much better' and 'Much better'. At 12-month follow-up, 13 per cent in the intervention group reported 'Much better' compared to eight per cent in the control group (Table 2).

#### **Table 2. Effect of intervention, primary outcome: Patient Global Impression of Change**

##### *Secondary outcomes*

There were no statistically significant differences between the groups at 12-month follow-up in any disease-related outcomes (Table 3). However, there was a statistically significant improvement in favour of the intervention group in 'general tendency to be mindful'. Moreover, there was a statistically significant difference between groups in 'perceived benefits of exercise' due to a small deterioration in the control group (Table 3). The numbers of people working, assessed by the WPAI:GH, was 56 (67%) at baseline and 48 (64%) at 12-month follow-up in the intervention group, compared to 52 (61%) at baseline and 50 (64%) at 12-month in the control group.

#### **Table 3. Effects of intervention, secondary outcomes estimated by ANCOVA adjusted for baseline scores**



### *Harms*

A total of 34 patients reported adverse events, 21 (28 %) in the intervention group, and 13 (17 %) in the control group. Increased pain and fatigue were the most frequent adverse events. Thirteen (nine in the intervention group and four in the control group) related the events to medication; 21 (12 in intervention and nine in control) to physical activity; four in the intervention group related the events to the VTP; two (one in intervention and one in control) related the events to alternative treatment.

For peer review only

## Discussion

In this pragmatic randomised controlled trial, we examined the effects of a multicomponent rehabilitation programme for patients with FM. The study demonstrated that a mindfulness- and acceptance-based intervention, the VTP, followed by supervised physical activity in patients with recently diagnosed FM was not more effective than treatment as usual. Only 13 per cent in the intervention group reported clinically relevant improvement in self-perceived health status at 12-month follow-up compared to eight per cent in the control group. We did not observe differences between the groups in any disease-related secondary outcomes. However, there were statistically significant differences between groups in tendency to be mindful and perceived benefits of exercise in favour of the intervention group. The latter was due to a slight deterioration in the control group.

The results of this trial both negate and support earlier studies on the VTP for patients with FM. One randomised controlled trial in patients with musculoskeletal pain conditions, including FM, demonstrated substantial health improvements (19). In contrast, a longitudinal study in patients with IA and FM showed improvements in the IA group, but not in the FM group (21). Based on the latter study, it was hypothesised that the lack of effects in patients with FM might have been related to living with distressing symptoms over a long time without receiving any diagnosis. The present study aimed to improve the management of FM by following the EULAR recommendations for management of FM in a Norwegian context. We assumed that offering patients who had been recently diagnosed with FM a mindfulness- and acceptance-based intervention might help them overcome some of their internal barriers to physical activity before they attended a physical activity intervention. However, we found no support for this assumption.

1  
2  
3 There were statistically significant differences between the groups in distribution of  
4 the PGIC-scores at three-month follow-up, but not at 12months. This corresponds to other  
5 studies on mindfulness- and acceptance-based interventions that have shown beneficial short-  
6 term effects, but no evidence for long-term effects (10, 11). Our primary outcome, the PGIC  
7 scale, was dichotomised to distinguish between those who reported clinically relevant  
8 improvement in self-perceived health and those who did not. This has also been performed in  
9 previous studies, in which clinically relevant improvements have been shown (33, 34).  
10 However, we did not find any clinically relevant differences between the groups in our study.  
11 Previous systematic reviews and meta-analyses on mindfulness- and acceptance-based  
12 interventions have shown small to moderate beneficial effects on pain, sleep quality and  
13 health-related quality of life for patients with FM (10-13). In the present study, we did not see  
14 any of these effects. However, we found a statistically significant effect in tendency to be  
15 mindful. Improvement in mindfulness may be associated with enhanced mental health  
16 outcomes (46, 47). Longer follow-up may be needed to see if this improvement will result in  
17 effects in other outcomes, such as perceived health status and physical activity.

18  
19 As many as 57 per cent of the patients never attended the HLC intervention, and they  
20 did not report any increase in physical activity at 12-month follow-up. Twelve of the 32  
21 patients who took part in the HLC intervention reported adverse events, such as increased  
22 pain and fatigue, which may have been one reason for quitting the training. This corresponds  
23 to other studies, which have shown that many patients report physical activity to be  
24 challenging, and that adherence to exercise interventions is poor (18, 48-50). Further studies  
25 are needed to explore ways to improve adherence to physical activity.

26  
27 Because we wanted to investigate if it was possible to prevent work loss and improve  
28 work participation, we excluded patients that had been out of work for more than two years.  
29 Long-term absence from work due to illness has been identified as a risk factor for transition  
30  
31  
32  
33  
34  
35  
36  
37  
38  
39  
40  
41  
42  
43  
44  
45  
46  
47  
48  
49  
50  
51  
52  
53  
54  
55  
56  
57  
58  
59  
60

1  
2  
3 into disability pension (51, 52). Seventy-one per cent of the patients in our study had paid  
4 work. Previous studies have shown that nonworking FM patients have more severe symptoms  
5 than working patients (53, 54). Despite the high number of workers in our study, the patients  
6 reported high symptoms burden, in terms of pain, fatigue and psychological distress.  
7  
8  
9

10  
11  
12 Because we assumed that higher age might be associated with more comorbid  
13 conditions, we defined 50 years as the upper age limit for inclusion. Nevertheless, the median  
14 number of comorbidities in the included patients was two.  
15  
16  
17

18  
19 Although we intended to capture patients with FM at an early stage of their disease,  
20 the included patients reported median symptoms duration of eight years. These findings,  
21 although contrary to our expectations, corresponds to other studies, which have shown that  
22 patients wait a significant time before presenting symptoms to a physician (55). Further, there  
23 may be a delay in diagnosis in primary health care due to an overlap of symptoms with other  
24 conditions and patients may have difficulties in communicating their symptoms (56). Other  
25 reasons for the delay in diagnosis and treatment may be lack of knowledge and understanding  
26 of FM from primary care physicians (57).  
27  
28  
29  
30  
31  
32  
33  
34  
35  
36

37 This study was conducted according to a predefined published protocol (23). It was  
38 well-powered, and all included patients were allocated to the groups to which they were  
39 randomised, ensuring valid treatment comparisons and assessment of treatment effects (58).  
40 The losses to follow-up were within our assumption of 10 %. We had predefined that patients  
41 needed to attend at least 50 per cent of the sessions to expect effects of the VTP intervention,  
42 and nearly 90 per cent attended more than half of the VTP sessions (23). This attendance rate  
43 is comparable to other studies on mindfulness- and acceptance-based interventions (13). The  
44 percentage of patients with complete follow-up data was high. The VTP facilitators were  
45 certified and followed a manualised programme, which improves transparency and replication  
46  
47  
48  
49  
50  
51  
52  
53  
54  
55  
56  
57  
58  
59  
60

1  
2  
3 (59). Moreover, the 12 months follow-up time was relatively long, and in line with what has  
4  
5 been asked for in previous research (13).  
6  
7

8  
9 Several limitations need to be mentioned. Firstly, before randomisation, all study  
10 participants received a short patient education session, which is recommended as a first-line  
11 intervention by the EULAR recommendations. This might have served as a validation of the  
12 FM diagnosis and may have provided the patients with knowledge and information about  
13 possible coping strategies. The control group could include strategies and activities at their  
14 own initiative. We did not monitor the content of ‘treatment as usual’ in the control group  
15 other than physical activity. Thus, we do not know if the patients had initiated beneficial self-  
16 management strategies during the control period.  
17  
18  
19  
20  
21  
22  
23  
24  
25  
26

27 Secondly, our study was a pragmatic randomised controlled trial, which makes it  
28 difficult to differentiate between the effects of the various interventions and to interpret the  
29 lack of effects. Moreover, we did not monitor the adherence to the homework between the  
30 VTP sessions. Consequently, we do not know to what extent the patients practised  
31 mindfulness training and integrated the training in their daily life. A recent review on  
32 mindfulness- and acceptance-based interventions showed a small but significant association  
33 between the extent of formal practice and positive intervention outcomes (60). It is  
34 recommended that future research should adopt a standardised approach for monitoring home-  
35 practice across mindfulness- and acceptance-based interventions (61). Further, we included  
36 already existing HLCs in the communities. The activities offered vary between centres, and  
37 consequently, it was not possible to standardise the frequency, intensity, duration, progression  
38 or type of exercise. Moreover, the HLCs offer physical exercise counselling at daytime only,  
39 making the intervention challenging to combine with a daytime job. Subsequently, a physical  
40 activity intervention with more flexible access might have increased the patient participation.  
41  
42  
43  
44  
45  
46  
47  
48  
49  
50  
51  
52  
53  
54  
55  
56  
57  
58  
59  
60

1  
2  
3 Thirdly, we did not include any coping measures, such as self-efficacy, to assess the  
4 coping with their symptoms. We used the GHQ-12 to assess mental health status because this  
5 was found to be sensitive to change in previous studies on the VTP. The GHQ-12 does not  
6 capture more severe symptoms of depression and anxiety but is a widely used instrument to  
7 assess psychological distress.  
8  
9

10  
11  
12 Finally, we could have applied other statistical analyses, such as Linear Mixed Models  
13 rather than ANCOVA, to estimate effects. However, ANCOVA was chosen because it has  
14 shown great power and low variability when compared to other traditional analyses  
15 approaches, and it is regarded as a preferred analysis when post-treatment assessments  
16 adjusted for the pre-treatment assessments are measured (62, 63).  
17  
18  
19  
20  
21  
22  
23  
24  
25  
26

27 This study has demonstrated that a multicomponent rehabilitation programme  
28 combining recent diagnosis and patient education with a mindfulness- and acceptance-based  
29 intervention followed by supervised physical exercise was not more effective than recent  
30 diagnosis, patient education and treatment as usual for patients with FM.  
31  
32  
33  
34  
35

36 There was a high drop-out rate from the physical activity intervention. Further, studies  
37 on how to adapt and tailor physical activity interventions to patients with FM are needed.  
38  
39

40 Our intention to include patients at an early stage of the disease was not fulfilled. The  
41 patients reported high symptoms burden and had a median symptoms duration of eight year.  
42 Thus, future research should aim at including patients with more recent disease onset and  
43 explore the effects of prompt diagnosis and patient education.  
44  
45  
46  
47  
48  
49  
50  
51  
52  
53  
54  
55  
56  
57  
58  
59  
60

## References

1. Wolfe F, Clauw DJ, Fitzcharles M-A, Goldenberg DL, Katz RS, Mease P, et al. The American College of Rheumatology Preliminary Diagnostic Criteria for Fibromyalgia and Measurement of Symptom Severity. *Arthritis Care & Research*. 2010;62(5):600-10.
2. Walitt B, Nahin RL, Katz RS, Bergman MJ, Wolfe F. The Prevalence and Characteristics of Fibromyalgia in the 2012 National Health Interview Survey. *PLOS ONE*. 2015;10(9):e0138024.
3. Clauw DJ. Fibromyalgia: An Overview. *The American Journal of Medicine*. 2009;122(12, Supplement):S3-S13.
4. Macfarlane GJ, Kronisch C, Dean LE, Atzeni F, Hauser W, Flus E, et al. EULAR revised recommendations for the management of fibromyalgia. *Annals of the Rheumatic Diseases*. 2017;76(2):318-28.
5. Verbunt JA, Pernot DH, Smeets RJ. Disability and quality of life in patients with fibromyalgia. 2008;6(1):8.
6. Marques AP, Santo ADSDE, Berssaneti AA, Matsutani LA, Yuan SLK. Prevalence of fibromyalgia: literature review update. *Revista Brasileira de Reumatologia (English Edition)*. 2017;57(4):356-63.
7. Hayes SM. Fibromyalgia and the therapeutic relationship: Where uncertainty meets attitude. *Pain Res Manage*. 2010;15.
8. Armentor JL. Living With a Contested, Stigmatized Illness: Experiences of Managing Relationships Among Women With Fibromyalgia. *Qual Health Res*. 2017;27(4):462-73.
9. Nuesch E, Hauser W, Bernardy K, Barth J, Juni P. Comparative efficacy of pharmacological and non-pharmacological interventions in fibromyalgia syndrome: network meta-analysis. *Annals of the Rheumatic Diseases [Internet]*. 2013; 72(6):[955-62 pp.].
10. Hauser W, Bernardy K, Arnold B, Offenbacher M, Schiltenwolf M. Efficacy of multicomponent treatment in fibromyalgia syndrome: a meta-analysis of randomized controlled clinical trials (Structured abstract). *Arthritis and Rheumatism (Arthritis Care and Research) [Internet]*. 2009; 61(2):[216-24 pp.].
11. Lauche R, Cramer H, Dobos G, Langhorst J, Schmidt S. A systematic review and meta-analysis of mindfulness-based stress reduction for the fibromyalgia syndrome *Journal of Psychosomatic Research [Internet]*. 2013; 75(6):[500-10 pp.].
12. Bernardy K, Klose P, Welsch P, Häuser W. Efficacy, acceptability and safety of cognitive behavioural therapies in fibromyalgia syndrome – A systematic review and meta-analysis of randomized controlled trials. *European Journal of Pain*. 2018;22(2):242-60.
13. Haugmark T, Hagen KB, Smedslund G, Zangi HA. Mindfulness- and acceptance-based interventions for patients with fibromyalgia – A systematic review and meta-analyses. *PLOS ONE*. 2019;14(9):e0221897.
14. Bidonde J, Busch AJ, Webber SC, Schachter CL, Danyliw A, Overend TJ, et al. Aquatic exercise training for fibromyalgia. *Cochrane Database of Systematic Reviews*. 2014(10).
15. Bidonde J, Busch AJ, Bath B, Milosavljevic S. Exercise for adults with fibromyalgia: an umbrella systematic review with synthesis of best evidence. *Current Rheumatology Reviews*. 2014;10(1):45-79.
16. Hauser W, Klose P, Langhorst J, Moradi B, Steinbach M, Schiltenwolf M, et al. Efficacy of different types of aerobic exercise in fibromyalgia syndrome: a systematic review and meta-analysis of randomised controlled trials (Provisional abstract). *Arthritis Research and Therapy [Internet]*. 2010; 12(3).
17. Perrot S, Russell IJ. More ubiquitous effects from non-pharmacologic than from pharmacologic treatments for fibromyalgia syndrome: A meta-analysis examining six core symptoms. *European Journal of Pain*. 2014;18(8):1067-80.
18. Bidonde J, Busch AJ, Schachter CL, Webber SC, Musselman KE, Overend TJ, et al. Mixed exercise training for adults with fibromyalgia. *Cochrane Database of Systematic Reviews*. 2019(5).

19. Haugli L, Steen E, Laerum E, Nygard R, Finset A. Learning to have less pain - is it possible? A one-year follow-up study of the effects of a personal construct group learning programme on patients with chronic musculoskeletal pain. *Patient Educ Couns*. 2001;45(2):111-8.
20. Zangi HA, Mowinckel P, Finset A, Eriksson LR, Hoystad TO, Lunde AK, et al. A mindfulness-based group intervention to reduce psychological distress and fatigue in patients with inflammatory rheumatic joint diseases: a randomised controlled trial. *Ann Rheum Dis*. 2012;71(6):911-7.
21. Zangi HA, Finset A, Steen E, Mowinckel P, Hagen KB. The effects of a vitality training programme on psychological distress in patient with inflammatory rheumatic diseases and fibromyalgia: a 1-year follow-up. *Scand J Rheumatol*. 2009;38:231-4.
22. Zangi HA, Hauge M-I, Steen E, Finset A, Hagen KB. "I am not only a disease, I am so much more". Patients with rheumatic diseases' experiences of an emotion-focused group intervention. *Patient education and counseling*. 2011;85(3):419-24.
23. Haugmark T, Hagen KB, Provan SA, Baerheim E, Zangi HA. Effects of a community-based multicomponent rehabilitation programme for patients with fibromyalgia: protocol for a randomised controlled trial. *BMJ Open*. 2018;8(6):e021004.
24. Craig P, Dieppe P, Macintyre S, Michie S, Nazareth I, Petticrew M. Developing and evaluating complex interventions: the new Medical Research Council guidance. *BMJ*. 2008;337.
25. Moher D, Hopewell S, Schulz KF, Montori V, Gøtzsche PC, Devereaux PJ, et al. CONSORT 2010 Explanation and Elaboration: updated guidelines for reporting parallel group randomised trials. *Journal of Clinical Epidemiology*. 2010;63(8):e1-e37.
26. Wolfe F, Clauw DJ, Fitzcharles MA, Goldenberg DL, Hauser W, Katz RL, et al. 2016 Revisions to the 2010/2011 fibromyalgia diagnostic criteria. *Semin Arthritis Rheum*. 2016.
27. Kabat-Zinn J. *Full Catastrophe Living: Using the Wisdom of Your Body and Mind to Face Stress, Pain and Illness*. New York.: Delacorte; 2013.
28. Steen E, Haugli L. The body has a history: an educational intervention programme for people with generalised chronic musculoskeletal pain. *Patient Educ Couns*. 2000;41(2):181-95.
29. Lundahl B, Burke BL. The effectiveness and applicability of motivational interviewing: a practice-friendly review of four meta-analyses. *J Clin Psychol*. 2009;65(11):1232-45.
30. Mease PJ, Clauw DJ, Christensen R, Crofford LJ, Gendreau RM, Martin SA, et al. Toward development of a fibromyalgia responder index and disease activity score: OMERACT module update. *J Rheumatol*. 2011;38(7):1487-95.
31. Choy EH, Arnold LM, Clauw D, Crofford L, Glass JM, Simon L, et al. Content and Criterion Validity of The Preliminary Core Dataset for Clinical Trials in Fibromyalgia Syndrome. *The Journal of rheumatology*. 2009;36(10):2330-4.
32. Beasley M, Prescott GJ, Scotland G, McBeth J, Lovell K, Keeley P, et al. Patient-reported improvements in health are maintained 2 years after completing a short course of cognitive behaviour therapy, exercise or both treatments for chronic widespread pain: long-term results from the MUSICIAN randomised controlled trial. *RMD Open*. 2015;1(1):e000026.
33. Rampakakis E, Ste-Marie PA, Sampalis JS, Karellis A, Shir Y, Fitzcharles MA. Real-life assessment of the validity of patient global impression of change in fibromyalgia. *RMD Open*. 2015;1(1):e000146.
34. McBeth J, Prescott G, Scotland G, Lovell K, Keeley P, Hannaford P, et al. Cognitive behavior therapy, exercise, or both for treating chronic widespread pain. *Arch Intern Med*. 2012;172(1):48-57.
35. Kamper SJ, Maher CG, Mackay G. Global rating of change scales: a review of strengths and weaknesses and considerations for design. *J Man Manip Ther*. 2009;17(3):163-70.
36. Malt UF, Mogstad TE, Refn IB. Goldberg's General Health Questionnaire. *Tidsskr Nor Laegeforen*. 1989;109(13):1391-4.
37. Nerdrum P, Geirdal AØ. Psychological Distress among Young Norwegian Health Professionals. *Professions and Professionalism*. 2014;4(No 1).
38. Goldberg D, Williams P. *A User's Guide to the General Health Questionnaire (GHQ)*. Windsor (UK): NFER Nelson Publishing Company; 1988.



- 1
- 2
- 3 39. Dundas I, Vøllestad J, Binder P-E, Sivertsen B. The Five Factor Mindfulness Questionnaire in
- 4 Norway. *Scandinavian Journal of Psychology*. 2013;54(3):250-60.
- 5 40. Kurtze N, Rangul V, Hustvedt BE, Flanders WD. Reliability and validity of self-reported
- 6 physical activity in the Nord-Trøndelag Health Study: HUNT 1. *Scand J Public Health*. 2008;36(1):52-
- 7 61.
- 8 41. Gecht MR, Connell KJ, Sinacore JM, Prohaska TR. A survey of exercise beliefs and exercise
- 9 habits among people with arthritis. *Arthritis Care Res*. 1996;9(2):82-8.
- 10 42. Reilly MC, Gooch KL, Wong RL, Kupper H, van der Heijde D. Validity, reliability and
- 11 responsiveness of the Work Productivity and Activity Impairment Questionnaire in ankylosing
- 12 spondylitis. *Rheumatology (Oxford)*. 2010;49(4):812-9.
- 13 43. Janssen MF, Pickard AS, Golicki D, Gudex C, Niewada M, Scalone L, et al. Measurement
- 14 properties of the EQ-5D-5L compared to the EQ-5D-3L across eight patient groups: a multi-country
- 15 study. *Quality of Life Research*. 2013;22(7):1717-27.
- 16 44. Obradovic M, Lal A, Liedgens H. Validity and responsiveness of EuroQol-5 dimension (EQ-5D)
- 17 versus Short Form-6 dimension (SF-6D) questionnaire in chronic pain. *Health Qual Life Outcomes*.
- 18 2013;11:110.
- 19 45. StataCorp. *Stata Statistical Software*. 14 ed. Texas, USA: StataCorp LP; 2015.
- 20 46. Dundas I, Vøllestad J, Binder P-E, Sivertsen B. The Five Factor Mindfulness Questionnaire in
- 21 Norway. *Scandinavian Journal of Psychology*. 2013;54(3):250-60.
- 22 47. Baer RA, Carmody J, Hunsinger M. Weekly Change in Mindfulness and Perceived Stress in a
- 23 Mindfulness-Based Stress Reduction Program. *Journal of Clinical Psychology*. 2012;68(7):755-65.
- 24 48. O'Dwyer T, Maguire S, Mockler D, Durcan L, Wilson F. Behaviour change interventions
- 25 targeting physical activity in adults with fibromyalgia: a systematic review. *Rheumatology*
- 26 *International*. 2019;39(5):805-17.
- 27 49. Álvarez-Gallardo IC, Bidonde J, Busch A, Westby M, Kenny GP, Delgado-Fernández M, et al.
- 28 Therapeutic validity of exercise interventions in the management of fibromyalgia. *J Sports Med Phys*
- 29 *Fitness*. 2019;59(5):828-38.
- 30 50. Richards SC, Scott DL. Prescribed exercise in people with fibromyalgia: parallel group
- 31 randomised controlled trial. *Bmj*. 2002;325(7357):185.
- 32 51. Gjesdal S, Bratberg E. Diagnosis and duration of sickness absence as predictors for disability
- 33 pension: results from a three-year, multi-register based\* and prospective study. *Scand J Public*
- 34 *Health*. 2003;31(4):246-54.
- 35 52. Virtanen M, Kivimäki M, Vahtera J, Elovainio M, Sund R, Virtanen P, et al. Sickness absence as
- 36 a risk factor for job termination, unemployment, and disability pension among temporary and
- 37 permanent employees. *Occupational and Environmental Medicine*. 2006;63(3):212-7.
- 38 53. Palstam A, Mannerkorpi K. Work Ability in Fibromyalgia: An Update in the 21st Century.
- 39 *Current rheumatology reviews*. 2017;13(3):180-7.
- 40 54. Henriksson CM, Liedberg GM, Gerdle B. Women with fibromyalgia: Work and rehabilitation.
- 41 *Disability and Rehabilitation*. 2005;27(12):685-94.
- 42 55. Gendelman O, Amital H, Bar-On Y, Ben-Ami Shor D, Amital D, Tiosano S, et al. Time to
- 43 diagnosis of fibromyalgia and factors associated with delayed diagnosis in primary care. *Best Pract*
- 44 *Res Clin Rheumatol*. 2018;32(4):489-99.
- 45 56. Golden A, D'Arcy Y, Masters ET, Clair A. Living with fibromyalgia: results from the functioning
- 46 with fibro survey highlight patients' experiences and relationships with health care providers.
- 47 *Nursing: Research and Reviews*. 2015;5:109-17.
- 48 57. Choy E, Perrot S, Leon T, Kaplan J, Petersel D, Ginovker A, et al. A patient survey of the impact
- 49 of fibromyalgia and the journey to diagnosis. *BMC Health Services Research*. 2010;10(1):102.
- 50 58. Armijo-Olivo S, Warren S, Magee D. Intention to treat analysis, compliance, drop-outs and
- 51 how to deal with missing data in clinical research: a review. *Physical Therapy Reviews*. 2009;14(1):36-
- 52 49.
- 53
- 54
- 55
- 56
- 57
- 58
- 59
- 60

- 1  
2  
3 59. Hoffmann TC, Glasziou PP, Boutron I, Milne R, Perera R, Moher D, et al. Better reporting of  
4 interventions: template for intervention description and replication (TIDieR) checklist and guide.  
5 BMJ. 2014;348(mar07 3):g1687-g.  
6  
7 60. Parsons CE, Crane C, Parsons LJ, Fjorback LO, Kuyken W. Home practice in Mindfulness-Based  
8 Cognitive Therapy and Mindfulness-Based Stress Reduction: A systematic review and meta-analysis  
9 of participants' mindfulness practice and its association with outcomes. Behaviour Research and  
10 Therapy. 2017;95:29-41.  
11 61. Lloyd A, White R, Eames C, Crane R. The Utility of Home-Practice in Mindfulness-Based Group  
12 Interventions: A Systematic Review. Mindfulness. 2018;9(3):673-92.  
13 62. O'Connell NS, Dai L, Jiang Y, Speiser JL, Ward R, Wei W, et al. Methods for Analysis of Pre-  
14 Post Data in Clinical Research: A Comparison of Five Common Methods. J Biom Biostat. 2017;8(1):1-  
15 8.  
16 63. Valente MJ, MacKinnon DP. Comparing models of change to estimate the mediated effect in  
17 the pretest-posttest control group design. Struct Equ Modeling. 2017;24(3):428-50.  
18  
19  
20  
21  
22  
23  
24  
25  
26  
27  
28  
29  
30  
31  
32  
33  
34  
35  
36  
37  
38  
39  
40  
41  
42  
43  
44  
45  
46  
47  
48  
49  
50  
51  
52  
53  
54  
55  
56  
57  
58  
59  
60

1  
2  
3 **Acknowledgement:** The authors would like to acknowledge and thank the patients who have  
4 participated and contributed in this study. We would also thank Oddfrid Nesse, Ingrid Helle  
5 Trana, Ann-Grete Dybvik Akre, Ida Sjørbotten, Linda Ann Rørkoll, Ingunn Tveit Nafstad,  
6 Bente Dreiem Løken, Marianne Iversen Mejia and Iren Folkem for having facilitated the  
7 Vitality Training groups. Further, we thank the Healthy Life Centers in Ullensaker, Eidsvoll,  
8 Nannestad, Hurdal, Gjerdrum, Nes, Oslo and Bærum. Finally, we want to thank the user  
9 representative, Astrid Kristine Andreassen.

10  
11  
12  
13  
14  
15  
16  
17  
18  
19  
20 **Funding:** This work was supported by the Norwegian South-Eastern Regional Health  
21 Authority (grant number 2016015).

22  
23  
24  
25 **Ethical approval:** This study was performed in line with the principals of the Declaration of  
26 Helsinki. Study design, information strategy, written consent formula and data security are  
27 approved by the Regional Committee for Medical and Health Research Ethics  
28 (2015/2447/REK sør-øst A).

29  
30  
31  
32  
33  
34  
35 **Consent to participate:** Informed consent was obtained from all individual patients included  
36 in the study.

37  
38  
39  
40  
41 **Author contributions:** Kåre Birger Hagen and Heidi A. Zangi contributed to the initial  
42 design of the project, and all authors contributed to the conception of the study. Material  
43 preparation, data collection and analysis were performed by Trond Haugmark, Sella A.  
44 Provan and Geir Smedslund. All authors contributed to the interpretation of the data. The first  
45 draft of the manuscript was written by Trond Haugmark and all authors commented and  
46 revised previous versions of the manuscript. All authors read and approved the final  
47 manuscript.

48  
49  
50  
51  
52  
53  
54  
55  
56  
57  
58 **Conflicts of interest:** The authors declare that they have no conflict of interest.  
59  
60

| Variables                                             | All Patients (n=170) | Intervention Group (n=85) | Control Group (n=85) | P-value           |
|-------------------------------------------------------|----------------------|---------------------------|----------------------|-------------------|
| <b>Age, years, median (min, max)</b>                  | 42 (24, 52)          | 44 (26, 52)               | 41 (24, 51)          | 0.02 <sup>1</sup> |
| <b>Gender, women</b>                                  | 159 (94%)            | 78 (92%)                  | 81 (95%)             | 0.54 <sup>3</sup> |
| <b>Education:</b>                                     |                      |                           |                      | 0.60 <sup>2</sup> |
| <i>Primary/ middle school (1-10 years)</i>            | 20 (12%)             | 8 (9%)                    | 12 (14%)             |                   |
| <i>Upper secondary school/ Vocational 10-12 years</i> | 68 (40%)             | 36 (42%)                  | 32 (38%)             |                   |
| <i>Bachelor/ University &gt;12 years</i>              | 81 (48%)             | 40 (47%)                  | 41 (48%)             |                   |
| <b>Work status:</b>                                   |                      |                           |                      |                   |
| Currently in paid work                                | 119 (70%)            | 59 (69%)                  | 60 (71%)             | 0.94 <sup>2</sup> |
| Not in paid work                                      | 48 (28%)             | 24 (28%)                  | 24 (28%)             | 0.94 <sup>2</sup> |
| <i>In paid work but on sick leave (100%)</i>          | 8 (17%)              | 3 (13%)                   | 5 (21%)              |                   |
| <i>Work assessment allowance</i>                      | 35 (73%)             | 20 (83%)                  | 15 (62%)             |                   |
| <i>Unemployed</i>                                     | 4 (8%)               | 1 (4%)                    | 3 (13%)              |                   |
| <i>Student</i>                                        | 1 (2%)               |                           | 1 (4%)               |                   |
| <b>Married/ living with partner</b>                   | 120 (71%)            | 54 (64%)                  | 66 (78%)             | 0.06 <sup>2</sup> |
| <b>Symptoms duration, years, median, (min, max)</b>   | 8 (1, 32)            | 10 (1, 32)                | 7 (1, 30)            | 0.05 <sup>1</sup> |
| <b>Comorbidities, median (min, max)</b>               | 2 (1, 6)             | 2 (1, 6)                  | 2 (1, 6)             | 0.24 <sup>1</sup> |
| <b>Smokers</b>                                        | 23 (14%)             | 14 (17%)                  | 9 (11%)              | 0.25 <sup>2</sup> |
| <b>FM in family</b>                                   | 57 (34%)             | 27 (32%)                  | 30 (35%)             | 0.55 <sup>2</sup> |
| <b>Use of medication in the last three months</b>     |                      |                           |                      |                   |
| <i>Pain medications:</i>                              | 149 (88%)            | 73 (86%)                  | 76 (89%)             | 0.64 <sup>2</sup> |
| <i>Hypnotics:</i>                                     | 51 (30%)             | 27 (32%)                  | 24 (28%)             | 0.63 <sup>2</sup> |
| <i>Antidepressants:</i>                               | 20 (12%)             | 8 (9%)                    | 12 (14%)             | 0.48 <sup>2</sup> |
| <i>Anxiolytics:</i>                                   | 8 (5%)               | 2 (2%)                    | 6 (7%)               | 0.28 <sup>3</sup> |

Values are means (SD) or numbers (%). FM: fibromyalgia, <sup>1</sup>Mann Whitney U test, <sup>2</sup>Pearson's Chi-Square test, <sup>3</sup>Fisher's exact test.

| PGIC                                                   | 3 months               |                   |                   | 12 months              |                   |                   |
|--------------------------------------------------------|------------------------|-------------------|-------------------|------------------------|-------------------|-------------------|
|                                                        | Intervention<br>(n=76) | Control<br>(n=84) | P-value           | Intervention<br>(n=76) | Control<br>(n=77) | P-value           |
| <b>Much better<br/>(scores 6<br/>and 7), n<br/>(%)</b> | 6 (7.9)                | 4 (4.8)           | 0.52 <sup>1</sup> | 10 (13.2)              | 6 (7.8)           | 0.28 <sup>2</sup> |

<sup>1</sup>Fisher's exact, <sup>2</sup>Pearson's Chi-Square test

For peer review only

|                                                                                   | Intervention<br>(n=76)<br>Mean (SD) | Control<br>(n=77)<br>Mean (SD) | Baseline adjusted<br>mean difference (95%<br>CI) | P-value |
|-----------------------------------------------------------------------------------|-------------------------------------|--------------------------------|--------------------------------------------------|---------|
| <b>Pain</b> (NRS 0-10, 0 = no pain)                                               |                                     |                                |                                                  |         |
| Baseline                                                                          | 6.7 (1.6)                           | 6.8 (1.9)                      | -                                                | -       |
| 3 months                                                                          | 6.4 (1.7)                           | 6.6 (1.8)                      | 0.30 (-0.15 to 0.75)                             | 0.19    |
| 12 months                                                                         | 5.8 (2.1)                           | 6.4 (1.8)                      | 0.55 (-0.00 to 1.11)                             | 0.05    |
| <b>Fatigue</b> (NRS 0-10, 0 = no fatigue)                                         |                                     |                                |                                                  |         |
| Baseline                                                                          | 7.5 (2.0)                           | 7.4 (2.0)                      | -                                                | -       |
| 3 months                                                                          | 7.2 (1.9)                           | 7.1 (2.2)                      | -0.03 (-0.60 to 0.54)                            | 0.92    |
| 12 months                                                                         | 6.8 (2.3)                           | 6.8 (2.3)                      | 0.12 (-0.56 to 0.80)                             | 0.72    |
| <b>Sleep</b> (NRS 0-10, 0 = no sleep)                                             |                                     |                                |                                                  |         |
| Baseline                                                                          | 6.8 (2.3)                           | 7.1 (2.5)                      | -                                                | -       |
| 3 months                                                                          | 6.6 (2.5)                           | 6.9 (2.5)                      | 0.27 (-0.42 to 0.97)                             | 0.44    |
| 12 months                                                                         | 6.5 (2.5)                           | 6.3 (2.5)                      | -0.24 (-0.99 to 0.50)                            | 0.52    |
| <b>Psychological distress</b> (GHQ-12, mean sum score, 0-36, 0 = no distress)     |                                     |                                |                                                  |         |
| Baseline                                                                          | 16.5 (6.6)                          | 19.2 (6.8)                     | -                                                | -       |
| 3 months                                                                          | 13.4 (6.5)                          | 16.5 (7.0)                     | 1.57 (-0.37 to 3.50)                             | 0.11    |
| 12 months                                                                         | 14.8 (6.8)                          | 16.6 (6.9)                     | 1.03 (-1.08 to 3.14)                             | 0.34    |
| <b>Five Facet Mindfulness Questionnaire</b> (Mean sum score, 39-195, low to high) |                                     |                                |                                                  |         |
| Baseline                                                                          | 119 (17.2)                          | 113 (16.9)                     | -                                                | -       |
| 3 months                                                                          | 124 (19.1)                          | 118 (16.3)                     | -1.07 (-4.73 to 2.58)                            | 0.56    |
| 12 months                                                                         | 126 (17.6)                          | 118 (16.3)                     | -4.72 (-8.57 to -0.9)                            | 0.02    |
| <b>Physical activity</b> (0-15, 0 = inactive)                                     |                                     |                                |                                                  |         |
| Baseline                                                                          | 3.0 (2.4)                           | 2.8 (1.8)                      | -                                                | -       |
| 3 months                                                                          | 2.3 (1.6)                           | 2.7 (1.9)                      | 0.53 (-0.04 to 1.10)                             | 0.07    |
| 12 months                                                                         | 2.9 (2.3)                           | 2.8 (1.8)                      | 0.10 (-0.60 to 0.79)                             | 0.78    |
| <b>Motivation and barriers for Physical Activity</b>                              |                                     |                                |                                                  |         |
| <i>Self-Efficacy</i> (4-20, low to high)                                          |                                     |                                |                                                  |         |
| Baseline                                                                          | 12.0 (2.9)                          | 12.0 (3.2)                     | -                                                | -       |
| 3 months                                                                          | 12.5 (3.1)                          | 12.6 (3.1)                     | 0.08 (-0.70 to 0.86)                             | 0.84    |
| 12 months                                                                         | 13.1 (3.5)                          | 12.8 (3.1)                     | -0.33 (-1.27 to 0.62)                            | 0.50    |
| <i>Barriers</i> (3-15, low to high)                                               |                                     |                                |                                                  |         |
| Baseline                                                                          | 12.1 (2.4)                          | 12.1 (2.0)                     | -                                                | -       |
| 3 months                                                                          | 11.8 (2.3)                          | 11.8 (1.9)                     | -0.00 (-0.48 to 0.47)                            | 0.99    |
| 12 months                                                                         | 12.2 (2.4)                          | 12.2 (1.7)                     | -0.07 (-0.61 to 0.46)                            | 0.79    |
| <i>Benefits</i> (5-25, low to high)                                               |                                     |                                |                                                  |         |
| Baseline                                                                          | 20.4 (3.2)                          | 21.1 (2.7)                     | -                                                | -       |
| 3 months                                                                          | 20.3 (3.0)                          | 20.4 (2.7)                     | -0.19 (-0.89 to 0.50)                            | 0.59    |
| 12 months                                                                         | 20.7 (3.0)                          | 20.1 (2.9)                     | -0.90 (-1.73 to -0.07)                           | 0.03    |
| <i>Impact</i> (8-40, low to high)                                                 |                                     |                                |                                                  |         |
| Baseline                                                                          | 28.8 (4.6)                          | 29.0 (4.8)                     | -                                                | -       |
| 3 months                                                                          | 28.4 (4.8)                          | 28.5 (4.3)                     | 0.08 (-0.90 to 1.06)                             | 0.87    |
| 12 months                                                                         | 28.9 (5.4)                          | 28.3 (4.6)                     | -0.49 (-1.63 to 0.65)                            | 0.40    |
| <b>Work Productivity and Activity Impairment General Health</b>                   |                                     |                                |                                                  |         |
| <i>Work impairment</i> (0-10, 10 = completely impaired)                           |                                     |                                |                                                  |         |
| Baseline                                                                          | 5.2 (2.5)                           | 6.2 (2.2)                      | -                                                | -       |
| 3 months                                                                          | 5.1 (2.4)                           | 5.4 (2.5)                      | -0.15 (-1.05 to 0.76)                            | 0.75    |
| 12 months                                                                         | 4.9 (3.2)                           | 5.3 (2.9)                      | 0.73 (-0.58 to 2.03)                             | 0.27    |
| <i>Daily activity impairment</i> (0-10, 10 = completely impaired)                 |                                     |                                |                                                  |         |
| Baseline                                                                          | 7.0 (2.0)                           | 7.1 (1.9)                      | -                                                | -       |
| 3 months                                                                          | 6.9 (1.7)                           | 6.7 (2.3)                      | -0.25 (-0.83 to 0.34)                            | 0.41    |
| 12 months                                                                         | 6.3 (2.5)                           | 6.5 (2.2)                      | 0.07 (-0.65 to 0.79)                             | 0.84    |
| <b>EQ-5D-5L</b>                                                                   |                                     |                                |                                                  |         |
| <i>Index</i> (0-1, 1 = perfect health)                                            |                                     |                                |                                                  |         |
| Baseline                                                                          | 0.51 (0.2)                          | 0.47 (0.2)                     | -                                                | -       |
| 3 months                                                                          | 0.55 (0.2)                          | 0.53 (0.2)                     | 0.02 (-0.05 to 0.09)                             | 0.86    |
| 12 months                                                                         | 0.54 (0.2)                          | 0.50 (0.2)                     | 0.04 (-0.03 to 0.11)                             | 0.48    |
| <i>VAS</i> (0-100, 100 = as good as it could be)                                  |                                     |                                |                                                  |         |
| Baseline                                                                          | 44.6 (16.5)                         | 41.61 (17.0)                   | -                                                | -       |

1  
2  
3  
4  
5  
6  
7  
8  
9  
10  
11  
12  
13  
14  
15  
16  
17  
18  
19  
20  
21  
22  
23  
24  
25  
26  
27  
28  
29  
30  
31  
32  
33  
34  
35  
36  
37  
38  
39  
40  
41  
42  
43  
44  
45  
46  
47  
48  
49  
50  
51  
52  
53  
54  
55  
56  
57  
58  
59  
60

|           |             |             |                       |      |
|-----------|-------------|-------------|-----------------------|------|
| 3 months  | 46.4 (16.1) | 51.5 (21.7) | -5.1 (-12.10 to 1.90) | 0.03 |
| 12 months | 49.0 (20.6) | 46.8 (18.5) | 2.19 (-4.67 to 9.05)  | 0.77 |

NRS=Numeric Rating Scale, GHQ-12=General Health Questionnaire, EQ-5D-5L=Health-related quality of life

For peer review only

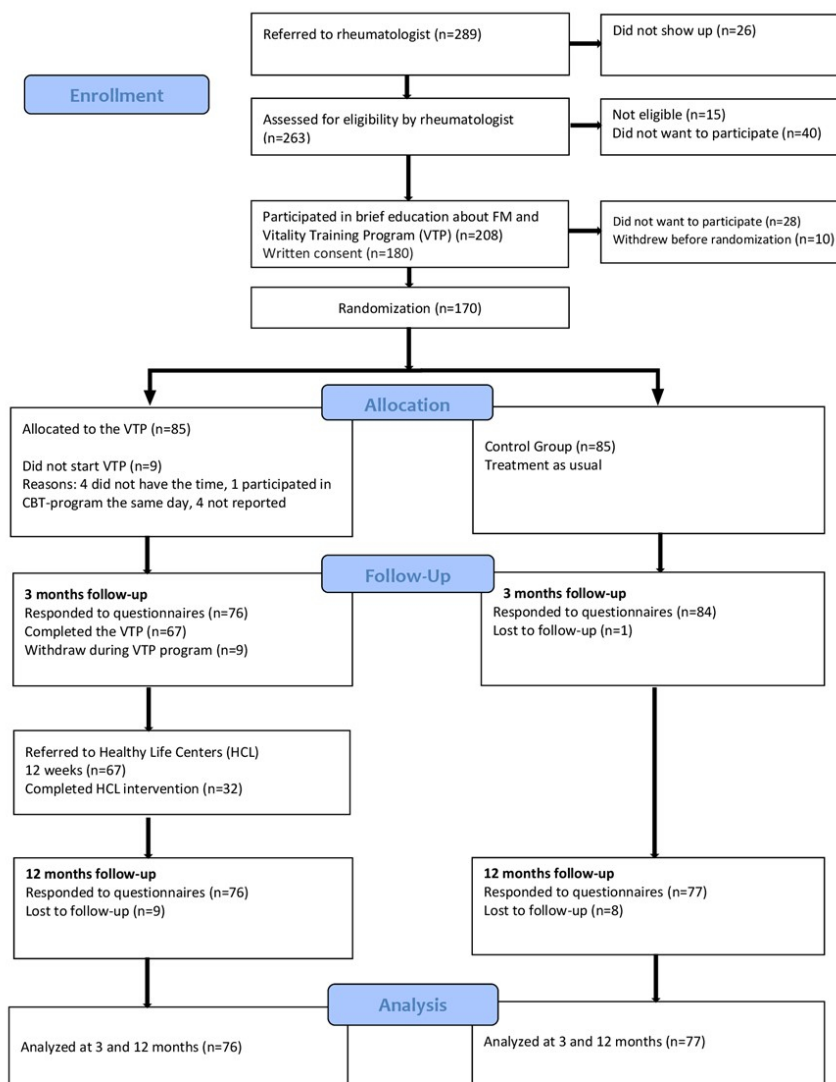

Figure 1. Flow chart of patients

160x207mm (150 x 150 DPI)



1  
2  
3  
4  
5  
6  
7  
8  
9  
10  
11  
12  
13  
14  
15  
16  
17  
18  
19  
20  
21  
22  
23  
24  
25  
26  
27  
28  
29  
30  
31  
32  
33  
34  
35  
36  
37  
38  
39  
40  
41  
42  
43  
44  
45  
46  
47  
48  
49  
50  
51  
52  
53  
54  
55  
56  
57  
58  
59  
60

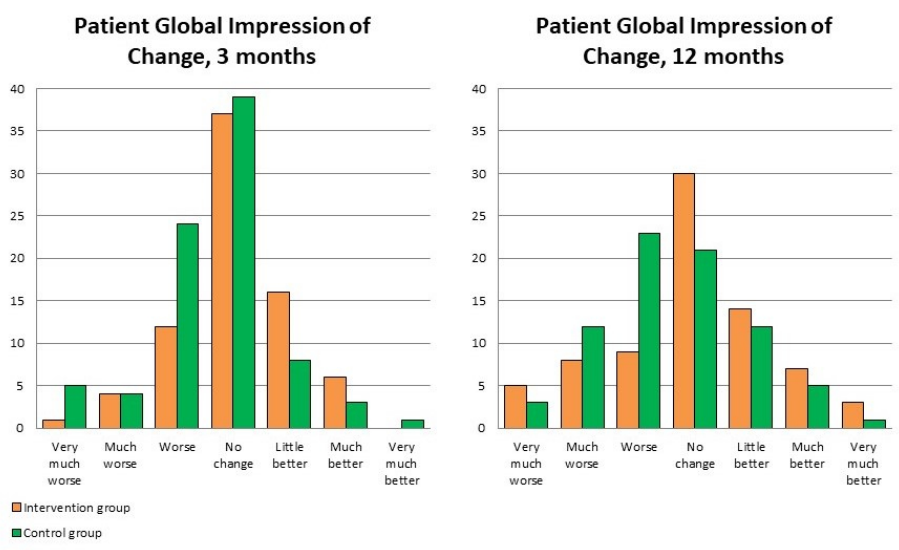

Figure 2. The distribution of PGIC scores

252x150mm (96 x 96 DPI)

## Supplementary file

### *Online Supplementary file 1*

#### Example from group session 6 in the Vitality Training Programme: Anger

The first part of the program is standard in all sessions: Participants are invited to share their reflection on experiences from home exercises after the previous session in groups of three to four persons. They are encouraged to read their reflective diaries for each other and to share and listen with an open, non-judgmental attitude without discussing or giving advice. Next, participants are invited to take part in an awareness exercise instructed by one of the group facilitators. They are guided to attend to their thoughts, feelings and bodily senses in the present moment with openness, acceptance and curiosity. After the exercise, they are invited to share their experiences with one other person in the group. In the next part of the session, the group facilitators introduce the topic "anger" by giving a short introduction about relationship between chronic illness and emotions and the purpose of addressing emotions. The participants are then invited to take part in an exercise with awareness of anger, introduced by one of the facilitators: "Think of the word anger... or to be angry. Notice what you become aware of... thoughts, maybe concrete situations, perhaps memories from the past... Are the situations that you become aware of new or old? Maybe both?... What do you experience in your body right now when you think of anger or being angry?... Also note whether the word anger or being angry evokes any other feelings..." Awareness of anger is continued in movement to music. The music allows participants to express anger with their body, and they are invited to let their bodies do what they want to do while listening to the music. Then, written hypothetical sentences are used to enhance discovery to tacit knowledge, for example: "If there are any other emotions related to my feeling of anger, it must be..." Participants are further invited to share and reflect upon experiences and discoveries from the exercise in small groups and in a plenary session. The next exercise is a guided imagery intending to help individuals connect to their experiences of anger in the present moment, and to explore its meaning. Further, crayons and white paper are used to draw an image of anger as experienced here and now. Again, participants are invited to share and reflect in small groups and in plenary, with focus on new discoveries and the consequences of these discoveries from the participants' daily life. Finally, they write a diary about their experiences from the whole session. Before closing the session, participants are asked to be aware of how they relate both to their own anger and anger from others in their daily lives. They are provided with guided mindfulness audio files and are encouraged to practice these exercises in everyday life and to train awareness in daily activities. They are asked to write reflective diaries about their thoughts, emotions and bodily senses.

Each session follows the same structure with exercise adapted to the particular topic. The group facilitators are health professionals, such as nurses and physiotherapists, and certified through a one-year university training programme (30 credits) at VID Specialized University in Oslo.

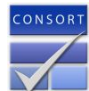

## CONSORT 2010 checklist of information to include when reporting a randomised trial\*

| Section/Topic                    | Item No | Checklist item                                                                                                                                                                              | Reported on page No |
|----------------------------------|---------|---------------------------------------------------------------------------------------------------------------------------------------------------------------------------------------------|---------------------|
| <b>Title and abstract</b>        |         |                                                                                                                                                                                             |                     |
|                                  | 1a      | Identification as a randomised trial in the title                                                                                                                                           | 1                   |
|                                  | 1b      | Structured summary of trial design, methods, results, and conclusions (for specific guidance see CONSORT for abstracts)                                                                     | 2,3                 |
| <b>Introduction</b>              |         |                                                                                                                                                                                             |                     |
| Background and objectives        | 2a      | Scientific background and explanation of rationale                                                                                                                                          | 4,5                 |
|                                  | 2b      | Specific objectives or hypotheses                                                                                                                                                           | 5                   |
| <b>Methods</b>                   |         |                                                                                                                                                                                             |                     |
| Trial design                     | 3a      | Description of trial design (such as parallel, factorial) including allocation ratio                                                                                                        | 6                   |
|                                  | 3b      | Important changes to methods after trial commencement (such as eligibility criteria), with reasons                                                                                          | NA                  |
| Participants                     | 4a      | Eligibility criteria for participants                                                                                                                                                       | 6                   |
|                                  | 4b      | Settings and locations where the data were collected                                                                                                                                        | 6,7                 |
| Interventions                    | 5       | The interventions for each group with sufficient details to allow replication, including how and when they were actually administered                                                       | 6,7                 |
| Outcomes                         | 6a      | Completely defined pre-specified primary and secondary outcome measures, including how and when they were assessed                                                                          | 8,9,10              |
|                                  | 6b      | Any changes to trial outcomes after the trial commenced, with reasons                                                                                                                       | NA                  |
| Sample size                      | 7a      | How sample size was determined                                                                                                                                                              | 10                  |
|                                  | 7b      | When applicable, explanation of any interim analyses and stopping guidelines                                                                                                                | NA                  |
| <b>Randomisation:</b>            |         |                                                                                                                                                                                             |                     |
| Sequence generation              | 8a      | Method used to generate the random allocation sequence                                                                                                                                      | 10                  |
|                                  | 8b      | Type of randomisation; details of any restriction (such as blocking and block size)                                                                                                         | 10                  |
| Allocation concealment mechanism | 9       | Mechanism used to implement the random allocation sequence (such as sequentially numbered containers), describing any steps taken to conceal the sequence until interventions were assigned | 10                  |
| Implementation                   | 10      | Who generated the random allocation sequence, who enrolled participants, and who assigned participants to interventions                                                                     | 10                  |
| Blinding                         | 11a     | If done, who was blinded after assignment to interventions (for example, participants, care providers, those                                                                                | 10                  |

|                                                      |     |                                                                                                                                                   |       |
|------------------------------------------------------|-----|---------------------------------------------------------------------------------------------------------------------------------------------------|-------|
|                                                      |     | assessing outcomes) and how                                                                                                                       |       |
|                                                      | 11b | If relevant, description of the similarity of interventions                                                                                       | NA    |
| Statistical methods                                  | 12a | Statistical methods used to compare groups for primary and secondary outcomes                                                                     | 10,11 |
|                                                      | 12b | Methods for additional analyses, such as subgroup analyses and adjusted analyses                                                                  | NA    |
| <b>Results</b>                                       |     |                                                                                                                                                   |       |
| Participant flow (a diagram is strongly recommended) | 13a | For each group, the numbers of participants who were randomly assigned, received intended treatment, and were analysed for the primary outcome    | 12    |
|                                                      | 13b | For each group, losses and exclusions after randomisation, together with reasons                                                                  | 12    |
| Recruitment                                          | 14a | Dates defining the periods of recruitment and follow-up                                                                                           | 12    |
|                                                      | 14b | Why the trial ended or was stopped                                                                                                                | 12    |
| Baseline data                                        | 15  | A table showing baseline demographic and clinical characteristics for each group                                                                  | 12    |
| Numbers analysed                                     | 16  | For each group, number of participants (denominator) included in each analysis and whether the analysis was by original assigned groups           | 12    |
| Outcomes and estimation                              | 17a | For each primary and secondary outcome, results for each group, and the estimated effect size and its precision (such as 95% confidence interval) | 13    |
|                                                      | 17b | For binary outcomes, presentation of both absolute and relative effect sizes is recommended                                                       | NA    |
| Ancillary analyses                                   | 18  | Results of any other analyses performed, including subgroup analyses and adjusted analyses, distinguishing pre-specified from exploratory         | NA    |
| Harms                                                | 19  | All important harms or unintended effects in each group (for specific guidance see CONSORT for harms)                                             | 14    |
| <b>Discussion</b>                                    |     |                                                                                                                                                   |       |
| Limitations                                          | 20  | Trial limitations, addressing sources of potential bias, imprecision, and, if relevant, multiplicity of analyses                                  | 18    |
| Generalisability                                     | 21  | Generalisability (external validity, applicability) of the trial findings                                                                         | 15-17 |
| Interpretation                                       | 22  | Interpretation consistent with results, balancing benefits and harms, and considering other relevant evidence                                     | 15-19 |
| <b>Other information</b>                             |     |                                                                                                                                                   |       |
| Registration                                         | 23  | Registration number and name of trial registry                                                                                                    | 3     |
| Protocol                                             | 24  | Where the full trial protocol can be accessed, if available                                                                                       | 3     |
| Funding                                              | 25  | Sources of funding and other support (such as supply of drugs), role of funders                                                                   | 24    |

\*We strongly recommend reading this statement in conjunction with the CONSORT 2010 Explanation and Elaboration for important clarifications on all the items. If relevant, we also recommend reading CONSORT extensions for cluster randomised trials, non-inferiority and equivalence trials, non-pharmacological treatments, herbal interventions, and pragmatic trials. Additional extensions are forthcoming: for those and for up to date references relevant to this checklist, see [www.consort-statement.org](http://www.consort-statement.org).

# BMJ Open

## Effects of a mindfulness- and acceptance-based group-programme followed by physical activity for patients with fibromyalgia: a randomised controlled trial

|                                 |                                                                                                                                                                                                                                                                                                                                                                                                                                                                                                                                                                                                                                    |
|---------------------------------|------------------------------------------------------------------------------------------------------------------------------------------------------------------------------------------------------------------------------------------------------------------------------------------------------------------------------------------------------------------------------------------------------------------------------------------------------------------------------------------------------------------------------------------------------------------------------------------------------------------------------------|
| Journal:                        | <i>BMJ Open</i>                                                                                                                                                                                                                                                                                                                                                                                                                                                                                                                                                                                                                    |
| Manuscript ID                   | bmjopen-2020-046943.R1                                                                                                                                                                                                                                                                                                                                                                                                                                                                                                                                                                                                             |
| Article Type:                   | Original research                                                                                                                                                                                                                                                                                                                                                                                                                                                                                                                                                                                                                  |
| Date Submitted by the Author:   | 26-May-2021                                                                                                                                                                                                                                                                                                                                                                                                                                                                                                                                                                                                                        |
| Complete List of Authors:       | Haugmark, Trond; Diakonhjemmet Sykehus AS, Department of Rheumatology: National Advisory Unit on Rehabilitation in Rheumatology; University of Oslo Faculty of Medicine, Institute of Health and Society<br>Hagen, Kåre; Norwegian Institute of Public Health, Division of Health Services<br>Provan, Sella; Diakonhjemmet Sykehus AS, Department of Rheumatology<br>Smedslund, Geir; Norwegian Institute of Public Health, Division of Health Services<br>Zangi, Heidi; Diakonhjemmet Sykehus AS, National Advisory Unit on Rehabilitation in Rheumatology, Rheumatological Dept.; VID Vitenskapelige Hogskole, Faculty of Health |
| <b>Primary Subject Heading</b>: | Rheumatology                                                                                                                                                                                                                                                                                                                                                                                                                                                                                                                                                                                                                       |
| Secondary Subject Heading:      | Rheumatology                                                                                                                                                                                                                                                                                                                                                                                                                                                                                                                                                                                                                       |
| Keywords:                       | RHEUMATOLOGY, REHABILITATION MEDICINE, PRIMARY CARE                                                                                                                                                                                                                                                                                                                                                                                                                                                                                                                                                                                |
|                                 |                                                                                                                                                                                                                                                                                                                                                                                                                                                                                                                                                                                                                                    |

SCHOLARONE™  
Manuscripts

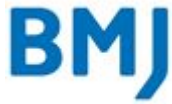

I, the Submitting Author has the right to grant and does grant on behalf of all authors of the Work (as defined in the below author licence), an exclusive licence and/or a non-exclusive licence for contributions from authors who are: i) UK Crown employees; ii) where BMJ has agreed a CC-BY licence shall apply, and/or iii) in accordance with the terms applicable for US Federal Government officers or employees acting as part of their official duties; on a worldwide, perpetual, irrevocable, royalty-free basis to BMJ Publishing Group Ltd ("BMJ") its licensees and where the relevant Journal is co-owned by BMJ to the co-owners of the Journal, to publish the Work in this journal and any other BMJ products and to exploit all rights, as set out in our [licence](#).

The Submitting Author accepts and understands that any supply made under these terms is made by BMJ to the Submitting Author unless you are acting as an employee on behalf of your employer or a postgraduate student of an affiliated institution which is paying any applicable article publishing charge ("APC") for Open Access articles. Where the Submitting Author wishes to make the Work available on an Open Access basis (and intends to pay the relevant APC), the terms of reuse of such Open Access shall be governed by a Creative Commons licence – details of these licences and which [Creative Commons](#) licence will apply to this Work are set out in our licence referred to above.

Other than as permitted in any relevant BMJ Author's Self Archiving Policies, I confirm this Work has not been accepted for publication elsewhere, is not being considered for publication elsewhere and does not duplicate material already published. I confirm all authors consent to publication of this Work and authorise the granting of this licence.

1  
2  
3 **Effects of a mindfulness- and acceptance-based group-programme followed by physical**  
4 **activity for patients with fibromyalgia: a randomised controlled trial**  
5  
6  
7  
8  
9  
10

11 Trond Haugmark<sup>1,2</sup>, Kåre Birger Hagen<sup>1,3</sup>, Sella Aarrestad Provan<sup>1</sup>, Geir Smedslund<sup>1,3</sup>, Heidi  
12  
13 A. Zangi<sup>1,4</sup>  
14  
15

16  
17 **Author details**  
18  
19

20 <sup>1</sup>Department of Rheumatology, National Advisory Unit on Rehabilitation in Rheumatology,  
21  
22 Diakonhjemmet Hospital, Oslo, Norway  
23  
24

25 <sup>2</sup>Faculty of Medicine, Institute of Health and Society, University of Oslo, Norway  
26  
27

28 <sup>3</sup>Division of Health Services, Norwegian Institute of Public Health, Oslo, Norway  
29  
30

31 <sup>4</sup>Faculty of Health, VID Specialized University, Oslo, Norway  
32  
33

34  
35  
36  
37 **Corresponding author**  
38  
39

40 Trond Haugmark, Department of Rheumatology, National Advisory Unit on Rehabilitation in  
41  
42 Rheumatology, Diakonhjemmet Hospital, PO Box 23 Vinderen, N-0319 Oslo, Norway  
43  
44

45  
46 Phone number: +47 95130795  
47  
48

49 E-mail: [trond.haugmark@diakonsyk.no](mailto:trond.haugmark@diakonsyk.no)  
50  
51

52 **Keywords:** fibromyalgia, rehabilitation, primary health care, mindfulness- and acceptance-  
53  
54 based interventions, physical activity, health promotion  
55  
56

57 **Word count: 4322**  
58  
59  
60

## Abstract

**Introduction:** Non-pharmacological approaches are recommended as first-line treatment for patients with fibromyalgia. This randomised controlled trial investigated the effects of a multicomponent rehabilitation programme for patients with recently diagnosed fibromyalgia in primary and secondary health care.

**Methods:** Patients with widespread pain  $\geq 3$  months were referred to rheumatologists for diagnostic clarification and assessment of study eligibility. Inclusion criteria were age 20 to 50, engaged in work or studies at present or during the past two years, and fibromyalgia diagnosed according to ACR 2010 criteria. All eligible patients participated in a short patient education programme before inclusion and randomisation. The multicomponent programme, a 10-session mindfulness- and acceptance-based group programme followed by 12 weeks physical activity counselling was evaluated in comparison to treatment as usual, i.e. no treatment or any other treatment of their choice. The primary outcome was the Patient Global Impression of Change (PGIC). Secondary outcomes were self-reported pain, fatigue, sleep quality, psychological distress, physical activity, health related quality of life and work ability at 12-month follow-up.

**Results:** In total, 170 patients were randomised, 1:1, intervention:control. Overall, the multicomponent rehabilitation programme was not more effective than treatment as usual; 13% in the intervention group and 8% in the control group reported clinically relevant improvement in PGIC ( $p=0.28$ ). No statistically significant between-group differences were found in any disease-related secondary outcomes. There were significant between-group differences in patient's tendency to be mindful ( $p=0.016$ ) and perceived benefits of exercise ( $p=0.033$ ) in favour of the intervention group.



1  
2  
3 **Conclusions:** A multicomponent rehabilitation programme combining patient education with  
4  
5 a mindfulness- and acceptance-based group-programme followed by physical activity  
6  
7 counselling was not more effective than patient education treatment as usual for patients with  
8  
9 recently diagnosed fibromyalgia at 12-month follow-up.  
10  
11  
12

13 **Trial registration:** The trial is registered at BMC ISRCTN96836577.  
14  
15

### 16 **Strengths and limitations of this study**

17  
18

- 19 • This pragmatic randomised controlled trial was conducted according to a predefined  
20 published protocol.
- 21
- 22 • The main treatment effects were analysed on an intention-to-treat basis at 12 months  
23 follow up, with all randomised patients retaining their original allocated groups.
- 24
- 25 • Although we intended to capture patients with FM at an early stage of their disease,  
26 the included patients reported median symptoms duration of eight years.
- 27
- 28 • There was a high drop-out rate from the physical activity intervention.
- 29
- 30 • We did not monitor the content of ‘treatment as usual’ in the control group other than  
31 physical activity.  
32  
33  
34  
35  
36  
37  
38  
39  
40  
41  
42  
43

### 44 **Protocol**

45

46 A published protocol article can be found at <https://bmjopen.bmj.com/content/8/6/e021004>  
47  
48  
49  
50  
51  
52  
53  
54  
55  
56  
57  
58  
59  
60

## Introduction

Fibromyalgia (FM) is characterised by widespread pain and symptoms such as fatigue, unrefreshed sleep, mood disturbances and cognitive impairment that have persisted more than three months without any alternative explanation (1). Patients report unpredictable symptoms that vary in terms of expression and intensity, and reduced quality of life (2-5). The estimated prevalence of FM in the general population worldwide is between 2% and 7%, with women being predominantly affected (6). Many patients experience lack of understanding from their primary care physicians, insufficient health care, and deficient treatment (7, 8).

For optimal management of FM, the European League Against Rheumatism (EULAR) recommends prompt diagnosis and patient education as first-line treatment. The effects of pharmacological treatments are inadequate (4). The management should aim at improving patients' health-related quality of life and initially focus on non-pharmacological modalities (4, 9). Individualised physical exercise is recommended for all patients with FM. Cognitive behavioural therapy, mindfulness-based stress reduction, meditative movement (i.e. qigong, yoga, tai chi), and hydrotherapy have shown promising effects for some patients, although the evidence is still insufficient (4). Further, multicomponent programmes combining physical exercise with either of these modalities have shown beneficial synergetic effects on FM symptoms in terms of reduced pain and FM impact, and increased physical fitness at the end of treatment (4, 10).

Three recent systematic reviews and meta-analyses have shown that mindfulness- and acceptance-based interventions had short-term small to moderate effects on pain, depression, anxiety, sleep quality and health-related quality of life in patients with FM (11-13). Systematic reviews and meta-analyses on physical exercise in patients with FM have shown beneficial effects on symptoms, such as pain, sleep, and physical function (14-18).

1  
2  
3 A Norwegian mindfulness- and acceptance-based intervention, the Vitality Training  
4 Programme (VTP), aimed at strengthening participants health-promoting resources and ability  
5 to make choices in accordance with own values, has been evaluated in two randomised  
6 controlled trials in persons with chronic musculoskeletal pain and inflammatory arthritis (IA).  
7  
8 The VTP improved pain, fatigue, psychological distress, pain coping, and self-efficacy for  
9 pain and other symptoms (19, 20). The effects persisted at 12-month follow-up in both  
10 studies. However, a preceding longitudinal pre-post-test study on the VTP in patients with IA  
11 and FM showed substantial improvements in patients with IA, but no changes in patients with  
12 FM (21). In a nested qualitative study, the FM patients described how they had struggled for  
13 years to be believed and taken seriously (22). The authors suggested that the lack of effects in  
14 patients with FM might have been related to long symptoms duration without recognition and  
15 treatment, which may have led to the development of maladaptive patterns of coping  
16 strategies that are difficult to change. They proposed that future studies should investigate the  
17 effects of the VTP in FM patients at an early stage of their disease.  
18  
19  
20  
21  
22  
23  
24  
25  
26  
27  
28  
29  
30  
31  
32  
33  
34  
35

36 The aim of the present randomised controlled trial was to study the effects of a  
37 community-based multicomponent rehabilitation programme comprising the VTP followed  
38 by 12 weeks of physical activity counselling in patients with recently diagnosed FM. More  
39 specifically, we examined whether the multicomponent rehabilitation programme improved  
40 patients' self-perceived health, pain, fatigue, sleep quality, psychological distress, physical  
41 activity and work ability, compared to treatment as usual, i.e. no treatment or any other  
42 treatment of their choice.  
43  
44  
45  
46  
47  
48  
49  
50  
51  
52  
53  
54  
55  
56  
57  
58  
59  
60

## Methods

### *Study design*

We conducted a two-armed parallel randomised controlled trial in rural and urban communities in the South-Eastern part of Norway. Patients were allocated to the VTP and physical activity (intervention group) or treatment as usual (control group). More details can be found in the published protocol (ISRCTN 96836577) (23). We followed the Consolidated Standards of Reporting Trials (CONSORT) in this report (24, 25).

### *Participants*

General practitioners and physiotherapists referred patients who had widespread pain that had lasted for at least three months to rheumatologists in specialist health care for diagnostic clarification and assessment of study eligibility. Inclusion criteria were age 20 to 50 and FM diagnosed according to the American College of Rheumatology (ACR) 2010 criteria (1, 26). Patients were excluded if they had an inflammatory rheumatic disease, had a severe psychiatric disorder, another disease that did not allow physical activity, or if they were unable to understand or write Norwegian. We also excluded patients who had been out of work for more than two years.

### *Procedure and interventions*

All eligible patients received a three-hour patient education programme and oral information about the study. Patients who agreed to participate completed written informed consent before inclusion. The VTP was organised in the local communities with seven to 12 patients in each group. It comprised ten weekly four-hour sessions plus a booster session after approximately six months. Every session addressed a specific topic: If my body could talk/ Who am I?/ My resources and potentials/ Values—what is important to me?/ What do I need?/ Strengths and limitations/ Bad conscience/ Anger/ Joy/ Resources, potentials and choices/ Closure and the way ahead. These were explored by various creative methods, such as guided imagery,

1  
2  
3 music, drawing, poetry, metaphors and reflections. The patients wrote logs after all exercises  
4  
5 and shared their experiences with other group participants.  
6

7  
8 Moreover, patients were invited to attend mindfulness meditation, i.e. body scan, sitting and  
9  
10 walking meditation, and gentle yoga exercises (27). They were encouraged to listen to guided  
11  
12 mindfulness meditation audio files and practice awareness in their daily activities between  
13  
14 sessions (28). The group facilitators were experienced nurses and physiotherapists, who were  
15  
16 certified by a one-year post-graduate training programme (30 credits). The facilitators  
17  
18 followed a standardised manual with a thorough programme description and monitored the  
19  
20 attendance throughout the programme. Based on previous studies, the patients needed to  
21  
22 attend at least five sessions to expect effect (20, 23). Supplementary file 1 describes an  
23  
24 example of the structure and content of one of the sessions.  
25  
26  
27

28  
29 The physical activity counselling was conducted at a Healthy Life Centre (HLC),  
30  
31 which is a low threshold health care service provided in Norwegian communities designed as  
32  
33 easily accessible generic services aimed at lifestyle changes. HLCs typically offer a 12-week  
34  
35 programme during daytime, comprising individual counselling based on Motivational  
36  
37 Interviewing (MI), individual and group physical activities (29). A physiotherapist provided  
38  
39 the individual physical activity counselling. This intervention aimed at helping patients to set  
40  
41 tailored goals, identifying and overcoming barriers to physical activity, and guiding them into  
42  
43 exercises that they could continue after the 12-week period to increase the level of physical  
44  
45 activity gradually.  
46  
47  
48

49  
50 Control group patients did not receive any organised intervention other than diagnostic  
51  
52 clarification and the patient education session but were free to attend any treatment and  
53  
54 activity at their own initiative. The control group was offered the VTP and the HLC  
55  
56 intervention after completion of the data collection at 12-month follow-up.  
57  
58  
59  
60

### *Outcomes*

The outcome measures were selected according to a core set of domains for FM defined by the Outcome Measures in Rheumatology Clinical Trials (OMERACT) (30, 31). Self-reported questionnaires comprising baseline demographics and all outcome measures were collected electronically before randomisation (baseline), after the VTP (three months) and at 12 months from baseline.

#### *Primary outcome: Patient Global Impression of Change (PGIC)*

PGIC is a validated ordinal seven-point self-reported scale that measures how patients feel that their health has changed from they entered the trial to post-intervention data collections. The scale ranges from 1 (I feel very much worse) through 4 (no change) to 7 (I feel very much better) (32). Scores 6 and 7 are considered a clinically relevant improvement. Patient Global Impression of Change (PGIC) has previously been used in FM trials and is recommended as a core measure to improve the applicability of information from clinical trials to clinical practice (33-35). Higher scores in PGIC has been associated with more significant improvements in key FM symptoms and correlates well with FM outcomes (33). The scores can be dichotomised into 'Less than much better' (scores 1 to 5) and 'Much better' (scores 6 and 7) (34).

#### *Secondary outcomes*

Pain, fatigue, and sleep quality were assessed by Numerical Rating Scales (NRS) scored from 0 to 10 (10 is intolerable pain/ fatigue/ very bad sleep) (31). Psychological distress was assessed by the General Health Questionnaire-12 (GHQ-12) that comprises six positively phrased items indicating psychological health and six negatively phrased items indicating psychological distress (36). The respondents scored their condition during the last two weeks compared to what they perceived as their 'normal' condition on a four-point Likert scale, reported from 0 (less than usual) to 3 (much more than usual). The scale was reversed for

1  
2  
3 negatively phrased items. Data were analysed and reported as mean sum score; higher scores  
4 represented higher psychological distress (37, 38). A general tendency to be mindful in daily  
5 life situations was assessed by the Five Facet Mindfulness Questionnaire (FFMQ) that  
6 comprises 39 items rated on a five-point Likert scale from 1 (never true) to 5 (always true)  
7 (39). Higher scores reflected higher levels of mindfulness. The scale was reversed for  
8 negatively phrased items. Data were analysed and reported as a mean sum score, comprising  
9 all five facets. Physical activity (PA) was assessed by three questions from the Nord-  
10 Trøndelag Health Study (HUNT1) (40). The questions measure frequency, intensity and  
11 duration of leisure-time physical exercises such as walking, skiing, swimming or other  
12 training/-sport activities that improve physical fitness. A summary index of weekly PA was  
13 calculated from the frequency, intensity and duration scales with scores from 0 to 15. Higher  
14 scores indicate increased PA. Motivation and barriers for physical activity were assessed by  
15 the Exercise Beliefs and Exercise Habits questionnaire comprising 20 items scored on a five-  
16 point Likert scale ranging from 'strongly agree' to 'strongly disagree' (41). The items were  
17 divided into four sub-scales calculated and reported separately as beliefs about one's ability to  
18 exercise, barriers to exercise, benefits of exercise, and impact of exercise on muscular pain.  
19 Work ability was assessed by the Work Productivity and Activity Impairment General Health  
20 V2.1 (WPAI:GH) comprising six questions to determine employment status; hours missed  
21 from work because of health problems or other reasons, and hours worked (42). Higher scores  
22 indicate more significant impairment and less productivity. For this study, we calculated the  
23 outcomes 'overall work impairment' and 'daily activity impairment'. Health-related quality of  
24 life was assessed with EuroQol (EQ-5D-5L) comprising five dimensions; mobility, self-care,  
25 usual activities, pain/discomfort and anxiety/depression scored on five levels: no problems,  
26 slight problems, moderate problems, severe problems, and extreme problems. The EQ-5D-5L  
27 scores range between 0–1, 0 indicates death, and 1 indicates perfect health (43). Secondly,  
28  
29  
30  
31  
32  
33  
34  
35  
36  
37  
38  
39  
40  
41  
42  
43  
44  
45  
46  
47  
48  
49  
50  
51  
52  
53  
54  
55  
56  
57  
58  
59  
60

1  
2  
3 the participants rate their overall health on a 0 - 100 hash-marked, vertical visual analogue  
4 scale (EQ-VAS), 0 is as bad as it could be, and 100 as good as it could be (44).  
5  
6  
7

### 8 *Harms*

9  
10 Patients were asked to report adverse events at 12 months and major symptoms that were  
11 associated with these events.  
12  
13  
14

### 15 *Randomisation and blinding*

16  
17 A statistician generated an electronic randomisation list for each geographical area to ensure  
18 approximately equal sample sizes. A research assistant not involved in the study generated the  
19 allocation sequence and assigned patients to study groups. Further, the facilitators of the VTP  
20 groups organised and administered the enrolment. Due to the nature of the intervention, it was  
21 not possible to blind the patients and the VTP facilitators to group allocation. The project  
22 leader and the research coordinator who were responsible for the data collection and data  
23 analysis were blinded to the allocation.  
24  
25  
26  
27  
28  
29  
30  
31  
32  
33  
34  
35

### 36 *Sample size*

37  
38 Sample size calculation was based on the primary outcome assuming that 10% in the control  
39 group would report clinically relevant improvement at 12 months follow-up, and that at least  
40 20% absolute difference in improvement rate between the groups would be considered a  
41 minimum clinically relevant difference. With allowance for 10% losses to follow-up, 70  
42 patients in each group were needed to have at least 80% power of detecting differences with  
43 5% alpha level.  
44  
45  
46  
47  
48  
49  
50  
51

### 52 *Statistical analyses*

53  
54 Mean values and standard deviation (SD) were calculated for continuous variables or as  
55 median with minimum and maximum values if skewed. Frequency numbers and percentages  
56 were calculated for categorical variables. Baseline differences in patients' characteristics  
57  
58  
59  
60



1  
2  
3 between intervention and control group were assessed by independent group t-test or Mann  
4  
5  
6  
7  
8  
9  
10  
11  
12  
13  
14  
15  
16  
17  
18  
19  
20  
21  
22  
23  
24  
25  
26  
27  
28  
29  
30  
31  
32  
33  
34  
35  
36  
37  
38  
39  
40  
41  
42  
43  
44  
45  
46  
47  
48  
49  
50  
51  
52  
53  
54  
55  
56  
57  
58  
59  
60

between intervention and control group were assessed by independent group t-test or Mann  
Whitney U test for continuous variables. For categorical variables, we used Pearson's Chi-  
square test or Fisher's exact test when the expected cell count fell below five. The treatment  
effects were analysed on an intention-to-treat basis with all randomised patients retaining their  
original allocated groups at 12 months. The distribution of the primary outcome (PGIC) was  
analysed as an ordinal variable by Mann Whitney U test. When dichotomised, the difference  
between groups was tested with Chi-square statistics and Fisher's exact tests. Treatment  
effects in secondary outcomes were estimated by Analysis of Covariance (ANCOVA) at three  
and 12-month follow-up adjusted for the baseline values. The level of statistical significance  
was set to  $\leq 0.05$ . We used STATA V.14.0 (45) to analyse the data. Missing values in single  
items of FFMQ and GHQ-12 were imputed by calculating the mean value of the registered  
values multiplied with the number of questions.

### *Patient and public involvement*

Representatives from the Patient Advisory Board at the Diakonhjemmet Hospital were  
involved in the development of the study, such as study design, research questions and  
recruitment of patients. The electronic questionnaires were tested and amended by user  
representatives. More information is described elsewhere (23).

## Results

Of the 289 patients who were referred to the rheumatologists, 208 (72%) were eligible for inclusion. A total of 170 consented to participate and were randomised; 85 to the intervention group and 85 to the control group. Figure 1 illustrates the flow of patients through the study.

### Figure 1. Flow chart of patients

The intervention group had a significant higher median age ( $p=0.02$ ) and symptoms duration in years ( $p=0.05$ ) compared to the control group. All other baseline characteristics were equally distributed between the groups (Table 1).

**Table 1. Patients' characteristics at baseline**

| Variables                                             | All Patients (n=170) | Intervention Group (n=85) | Control Group (n=85) | P-value           |
|-------------------------------------------------------|----------------------|---------------------------|----------------------|-------------------|
| <b>Age, years, median (min, max)</b>                  | 42 (24, 52)          | 44 (26, 52)               | 41 (24, 51)          | 0.02 <sup>1</sup> |
| <b>Gender, women</b>                                  | 159 (94%)            | 78 (92%)                  | 81 (95%)             | 0.54 <sup>3</sup> |
| <b>Education:</b>                                     |                      |                           |                      | 0.60 <sup>2</sup> |
| <i>Primary/ middle school (1-10 years)</i>            | 20 (12%)             | 8 (9%)                    | 12 (14%)             |                   |
| <i>Upper secondary school/ Vocational 10-12 years</i> | 68 (40%)             | 36 (42%)                  | 32 (38%)             |                   |
| <i>Bachelor/ University &gt;12 years</i>              | 81 (48%)             | 40 (47%)                  | 41 (48%)             |                   |
| <b>Work status:</b>                                   |                      |                           |                      |                   |
| Currently in paid work                                | 119 (70%)            | 59 (69%)                  | 60 (71%)             | 0.94 <sup>2</sup> |
| Not in paid work                                      | 48 (28%)             | 24 (28%)                  | 24 (28%)             | 0.94 <sup>2</sup> |
| <i>In paid work but on sick leave (100%)</i>          | 8 (17%)              | 3 (13%)                   | 5 (21%)              |                   |
| <i>Work assessment allowance</i>                      | 35 (73%)             | 20 (83%)                  | 15 (62%)             |                   |
| <i>Unemployed</i>                                     | 4 (8%)               | 1 (4%)                    | 3 (13%)              |                   |
| <i>Student</i>                                        | 1 (2%)               |                           | 1 (4%)               |                   |
| <b>Married/ living with partner</b>                   | 120 (71%)            | 54 (64%)                  | 66 (78%)             | 0.06 <sup>2</sup> |
| <b>Symptoms duration, years, median, (min, max)</b>   | 8 (1, 32)            | 10 (1, 32)                | 7 (1, 30)            | 0.05 <sup>1</sup> |
| <b>Comorbidities, median (min, max)</b>               | 2 (1, 6)             | 2 (1, 6)                  | 2 (1, 6)             | 0.24 <sup>1</sup> |

|                                                   |           |          |          |                   |
|---------------------------------------------------|-----------|----------|----------|-------------------|
| <b>Smokers</b>                                    | 23 (14%)  | 14 (17%) | 9 (11%)  | 0.25 <sup>2</sup> |
| <b>FM in family</b>                               | 57 (34%)  | 27 (32%) | 30 (35%) | 0.55 <sup>2</sup> |
| <b>Use of medication in the last three months</b> |           |          |          |                   |
| <i>Pain medications:</i>                          | 149 (88%) | 73 (86%) | 76 (89%) | 0.64 <sup>2</sup> |
| <i>Hypnotics:</i>                                 | 51 (30%)  | 27 (32%) | 24 (28%) | 0.63 <sup>2</sup> |
| <i>Antidepressants:</i>                           | 20 (12%)  | 8 (9%)   | 12 (14%) | 0.48 <sup>2</sup> |
| <i>Anxiolytics:</i>                               | 8 (5%)    | 2 (2%)   | 6 (7%)   | 0.28 <sup>3</sup> |

Values are means (SD) or numbers (%). FM: fibromyalgia, <sup>1</sup>Mann Whitney U test, <sup>2</sup>Pearson's Chi-Square test, <sup>3</sup>Fisher's exact test.

Of the 75 patients who attended the VTP, 67 (89%) completed five sessions or more; 21 (31%) of these patients completed all ten sessions, 20 (30%) completed nine, and nine (13%) completed eight sessions. The average attendance rate was 7.5 sessions. Thirty-two patients (43%) attended the physical activity intervention after the VTP, but only 14 patients participated more than 12 times during the 12-week programme. The data collection was completed by 160 (94%) at three months and 153 (90%), and 12 months. Recruitment of patients started in September 2016 and ended in August 2018. Electronic data collection started in February 2017 and ended in September 2019 when the complete 12-month follow-up data were attained.

### *Patient Global Impression of Change*

The median PGIC score was 4 (range 1 to 7) in both groups at three and 12-month follow-up. However, we found statistically significant differences between the groups in distribution of the PGIC-scores at three-month follow up ( $p=0.01$ ), but not at 12-month follow up ( $p=0.06$ ). The distribution across all response categories is shown in Figure 2.

#### **Figure 2. The distribution of PGIC scores**

There were no statistically significant differences between the intervention group and the control group at three- and 12-month follow-ups when the PGIC was dichotomised into 'Less than much better' and 'Much better'. At 12-month follow-up, 13 per cent in the intervention group reported 'Much better' compared to eight per cent in the control group (Table 2).

**Table 2. Effect of intervention, primary outcome: Patient Global Impression of Change**

| PGIC                                                   | 3 months               |                   |                   | 12 months              |                   |                   |
|--------------------------------------------------------|------------------------|-------------------|-------------------|------------------------|-------------------|-------------------|
|                                                        | Intervention<br>(n=76) | Control<br>(n=84) | P-value           | Intervention<br>(n=76) | Control<br>(n=77) | P-value           |
| <b>Much better<br/>(scores 6<br/>and 7), n<br/>(%)</b> | 6 (7.9)                | 4 (4.8)           | 0.52 <sup>1</sup> | 10 (13.2)              | 6 (7.8)           | 0.28 <sup>2</sup> |

<sup>1</sup>Fisher's exact, <sup>2</sup>Pearson's Chi-Square test

### *Secondary outcomes*

There were no statistically significant differences between the groups at 12-month follow-up in any disease-related outcomes (Table 3). However, there was a statistically significant improvement in favour of the intervention group in 'general tendency to be mindful'. Moreover, there was a statistically significant difference between groups in 'perceived benefits of exercise' due to a small deterioration in the control group (Table 3). The numbers of people working, assessed by the WPAI:GH, was 56 (67%) at baseline and 48 (64%) at 12-

month follow-up in the intervention group, compared to 52 (61%) at baseline and 50 (64%) at 12-month in the control group.

**Table 3. Effects of intervention, secondary outcomes estimated by ANCOVA adjusted for baseline scores**

|                                                                                   |           | <b>Intervention<br/>(n=76)<br/>Mean (SD)</b> | <b>Control<br/>(n=77)<br/>Mean (SD)</b> | <b>Baseline adjusted<br/>mean difference (95%<br/>CI)</b> | <b>P-value</b> |
|-----------------------------------------------------------------------------------|-----------|----------------------------------------------|-----------------------------------------|-----------------------------------------------------------|----------------|
| <b>Pain (NRS 0-10, 0 = no pain)</b>                                               |           |                                              |                                         |                                                           |                |
|                                                                                   | Baseline  | 6.7 (1.6)                                    | 6.8 (1.9)                               | -                                                         | -              |
|                                                                                   | 3 months  | 6.4 (1.7)                                    | 6.6 (1.8)                               | 0.30 (-0.15 to 0.75)                                      | 0.19           |
|                                                                                   | 12 months | 5.8 (2.1)                                    | 6.4 (1.8)                               | 0.55 (-0.00 to 1.11)                                      | 0.05           |
| <b>Fatigue (NRS 0-10, 0 = no fatigue)</b>                                         |           |                                              |                                         |                                                           |                |
|                                                                                   | Baseline  | 7.5 (2.0)                                    | 7.4 (2.0)                               | -                                                         | -              |
|                                                                                   | 3 months  | 7.2 (1.9)                                    | 7.1 (2.2)                               | -0.03 (-0.60 to 0.54)                                     | 0.92           |
|                                                                                   | 12 months | 6.8 (2.3)                                    | 6.8 (2.3)                               | 0.12 (-0.56 to 0.80)                                      | 0.72           |
| <b>Sleep (NRS 0-10, 0 = no sleep)</b>                                             |           |                                              |                                         |                                                           |                |
|                                                                                   | Baseline  | 6.8 (2.3)                                    | 7.1 (2.5)                               | -                                                         | -              |
|                                                                                   | 3 months  | 6.6 (2.5)                                    | 6.9 (2.5)                               | 0.27 (-0.42 to 0.97)                                      | 0.44           |
|                                                                                   | 12 months | 6.5 (2.5)                                    | 6.3 (2.5)                               | -0.24 (-0.99 to 0.50)                                     | 0.52           |
| <b>Psychological distress (GHQ-12, mean sum score, 0-36, 0 = no distress)</b>     |           |                                              |                                         |                                                           |                |
|                                                                                   | Baseline  | 16.5 (6.6)                                   | 19.2 (6.8)                              | -                                                         | -              |
|                                                                                   | 3 months  | 13.4 (6.5)                                   | 16.5 (7.0)                              | 1.57 (-0.37 to 3.50)                                      | 0.11           |
|                                                                                   | 12 months | 14.8 (6.8)                                   | 16.6 (6.9)                              | 1.03 (-1.08 to 3.14)                                      | 0.34           |
| <b>Five Facet Mindfulness Questionnaire (Mean sum score, 39-195, low to high)</b> |           |                                              |                                         |                                                           |                |
|                                                                                   | Baseline  | 119 (17.2)                                   | 113 (16.9)                              | -                                                         | -              |
|                                                                                   | 3 months  | 124 (19.1)                                   | 118 (16.3)                              | -1.07 (-4.73 to 2.58)                                     | 0.56           |
|                                                                                   | 12 months | 126 (17.6)                                   | 118 (16.3)                              | -4.72 (-8.57 to -0.9)                                     | 0.02           |
| <b>Physical activity (0-15, 0 = inactive)</b>                                     |           |                                              |                                         |                                                           |                |
|                                                                                   | Baseline  | 3.0 (2.4)                                    | 2.8 (1.8)                               | -                                                         | -              |
|                                                                                   | 3 months  | 2.3 (1.6)                                    | 2.7 (1.9)                               | 0.53 (-0.04 to 1.10)                                      | 0.07           |
|                                                                                   | 12 months | 2.9 (2.3)                                    | 2.8 (1.8)                               | 0.10 (-0.60 to 0.79)                                      | 0.78           |
| <b>Motivation and barriers for Physical Activity</b>                              |           |                                              |                                         |                                                           |                |
| <i>Self-Efficacy (4-20, low to high)</i>                                          |           |                                              |                                         |                                                           |                |
|                                                                                   | Baseline  | 12.0 (2.9)                                   | 12.0 (3.2)                              | -                                                         | -              |
|                                                                                   | 3 months  | 12.5 (3.1)                                   | 12.6 (3.1)                              | 0.08 (-0.70 to 0.86)                                      | 0.84           |
|                                                                                   | 12 months | 13.1 (3.5)                                   | 12.8 (3.1)                              | -0.33 (-1.27 to 0.62)                                     | 0.50           |
| <i>Barriers (3-15, low to high)</i>                                               |           |                                              |                                         |                                                           |                |
|                                                                                   | Baseline  | 12.1 (2.4)                                   | 12.1 (2.0)                              | -                                                         | -              |
|                                                                                   | 3 months  | 11.8 (2.3)                                   | 11.8 (1.9)                              | -0.00 (-0.48 to 0.47)                                     | 0.99           |
|                                                                                   | 12 months | 12.2 (2.4)                                   | 12.2 (1.7)                              | -0.07 (-0.61 to 0.46)                                     | 0.79           |
| <i>Benefits (5-25, low to high)</i>                                               |           |                                              |                                         |                                                           |                |
|                                                                                   | Baseline  | 20.4 (3.2)                                   | 21.1 (2.7)                              | -                                                         | -              |
|                                                                                   | 3 months  | 20.3 (3.0)                                   | 20.4 (2.7)                              | -0.19 (-0.89 to 0.50)                                     | 0.59           |
|                                                                                   | 12 months | 20.7 (3.0)                                   | 20.1 (2.9)                              | -0.90 (-1.73 to -0.07)                                    | 0.03           |
| <i>Impact (8-40, low to high)</i>                                                 |           |                                              |                                         |                                                           |                |
|                                                                                   | Baseline  | 28.8 (4.6)                                   | 29.0 (4.8)                              | -                                                         | -              |
|                                                                                   | 3 months  | 28.4 (4.8)                                   | 28.5 (4.3)                              | 0.08 (-0.90 to 1.06)                                      | 0.87           |
|                                                                                   | 12 months | 28.9 (5.4)                                   | 28.3 (4.6)                              | -0.49 (-1.63 to 0.65)                                     | 0.40           |
| <b>Work Productivity and Activity Impairment General Health</b>                   |           |                                              |                                         |                                                           |                |
| <i>Work impairment (0-10, 10 = completely impaired)</i>                           |           |                                              |                                         |                                                           |                |
|                                                                                   | Baseline  | 5.2 (2.5)                                    | 6.2 (2.2)                               | -                                                         | -              |
|                                                                                   | 3 months  | 5.1 (2.4)                                    | 5.4 (2.5)                               | -0.15 (-1.05 to 0.76)                                     | 0.75           |

|                                                                   |           |             |              |                       |      |
|-------------------------------------------------------------------|-----------|-------------|--------------|-----------------------|------|
|                                                                   | 12 months | 4.9 (3.2)   | 5.3 (2.9)    | 0.73 (-0.58 to 2.03)  | 0.27 |
| <i>Daily activity impairment</i> (0-10, 10 = completely impaired) |           |             |              |                       |      |
|                                                                   | Baseline  | 7.0 (2.0)   | 7.1 (1.9)    | -                     | -    |
|                                                                   | 3 months  | 6.9 (1.7)   | 6.7 (2.3)    | -0.25 (-0.83 to 0.34) | 0.41 |
|                                                                   | 12 months | 6.3 (2.5)   | 6.5 (2.2)    | 0.07 (-0.65 to 0.79)  | 0.84 |
| <b>EQ-5D-5L</b>                                                   |           |             |              |                       |      |
| <i>Index</i> (0-1, 1 = perfect health)                            |           |             |              |                       |      |
|                                                                   | Baseline  | 0.51 (0.2)  | 0.47 (0.2)   | -                     | -    |
|                                                                   | 3 months  | 0.55 (0.2)  | 0.53 (0.2)   | 0.02 (-0.05 to 0.09)  | 0.86 |
|                                                                   | 12 months | 0.54 (0.2)  | 0.50 (0.2)   | 0.04 (-0.03 to 0.11)  | 0.48 |
| <i>VAS</i> (0-100, 100 = as good as it could be)                  |           |             |              |                       |      |
|                                                                   | Baseline  | 44.6 (16.5) | 41.61 (17.0) | -                     | -    |
|                                                                   | 3 months  | 46.4 (16.1) | 51.5 (21.7)  | -5.1 (-12.10 to 1.90) | 0.03 |
|                                                                   | 12 months | 49.0 (20.6) | 46.8 (18.5)  | 2.19 (-4.67 to 9.05)  | 0.77 |

NRS=Numeric Rating Scale, GHQ-12=General Health Questionnaire, EQ-5D-5L=Health-related quality of life

### *Harms*

A total of 34 patients reported adverse events, 21 (28 %) in the intervention group, and 13 (17 %) in the control group. Increased pain and fatigue were the most frequent adverse events. Thirteen (nine in the intervention group and four in the control group) related the events to medication; 21 (12 in intervention and nine in control) to physical activity; four in the intervention group related the events to the VTP; two (one in intervention and one in control) related the events to alternative treatment.

## Discussion

In this pragmatic randomised controlled trial, we examined the effects of a multicomponent rehabilitation programme for patients with FM. The study demonstrated that a mindfulness- and acceptance-based intervention, the VTP, followed by physical activity counselling in patients with recently diagnosed FM was not more effective than treatment as usual. Only 13 per cent in the intervention group reported clinically relevant improvement in self-perceived health status at 12-month follow-up compared to eight per cent in the control group. We did not observe differences between the groups in any disease-related secondary outcomes. However, there were statistically significant differences between groups in 'tendency to be mindful' and 'perceived benefits of exercise' in favour of the intervention group. The latter was due to a slight deterioration in the control group.

The results of this trial both negate and support earlier studies on the VTP for patients with FM. One randomised controlled trial in patients with musculoskeletal pain conditions, including FM, demonstrated substantial health improvements (19). In contrast, a longitudinal study in patients with IA and FM showed improvements in the IA group, but not in the FM group (21). Based on the latter study, it was hypothesised that the lack of effects in patients with FM might have been related to living with distressing symptoms over a long time without receiving any diagnosis. The present study aimed to improve the management of FM by following the EULAR recommendations for management of FM in a Norwegian context. We assumed that offering patients who had been recently diagnosed with FM a mindfulness- and acceptance-based intervention might help them overcome some of their internal barriers to physical activity before they attended a physical activity intervention. However, we found no support for this assumption.

1  
2  
3 There were statistically significant differences between the groups in distribution of  
4 the PGIC-scores at three-month follow-up, but not at 12months. This corresponds to other  
5 studies on mindfulness- and acceptance-based interventions that have shown beneficial short-  
6 term effects, but no evidence for long-term effects (10, 11). Our primary outcome, the PGIC  
7 scale, was dichotomised to distinguish between those who reported clinically relevant  
8 improvement in self-perceived health and those who did not. This has also been performed in  
9 previous studies, in which clinically relevant improvements have been shown (33, 34).  
10 However, we did not find any clinically relevant differences between the groups in our study.  
11 Previous systematic reviews and meta-analyses on mindfulness- and acceptance-based  
12 interventions have shown small to moderate beneficial effects on pain, sleep quality and  
13 health-related quality of life for patients with FM (10-13). In the present study, we did not see  
14 any of these effects. However, we found a statistically significant effect in ‘tendency to be  
15 mindful’. Improvement in mindfulness may be associated with enhanced mental health  
16 outcomes (46, 47). Longer follow-up may be needed to see if this improvement will result in  
17 effects in other outcomes, such as perceived health status and physical activity.

18  
19  
20  
21  
22  
23  
24  
25  
26  
27  
28  
29  
30  
31  
32  
33  
34  
35  
36  
37 As many as 57 per cent of the patients never attended the HLC intervention, and they  
38 did not report any increase in physical activity at 12-month follow-up. Twelve of the 32  
39 patients who took part in the HLC intervention reported adverse events, such as increased  
40 pain and fatigue, which may have been one reason for quitting the training. This corresponds  
41 to other studies, which have shown that many patients report physical activity to be  
42 challenging, and that adherence to exercise interventions is poor (18, 48-50). A recent  
43 systematic review showed that physical activity should be tailored to individual characteristics  
44 to be effective (51). Given the varied clinical picture associated with FM, the initial object of  
45 the HLC intervention was to adapt the physical activity to each patient’s physical condition  
46 and individual preferences. The patients reported the type of physical activity they performed  
47  
48  
49  
50  
51  
52  
53  
54  
55  
56  
57  
58  
59  
60



1  
2  
3 in general terms, such as walking, strength training, cycling, spinning, etc. A limitation of our  
4  
5 study is that we did not monitor to which degree the physiotherapists at the HLC adapted the  
6  
7 physical activity to the individual patient's condition, nor did we monitor if the patients  
8  
9 experienced that the physical activity was individually tailored. Further studies are needed to  
10  
11 explore ways to improve adherence to physical activity.  
12  
13

14  
15 Because we wanted to investigate if it was possible to prevent work loss and improve  
16  
17 work participation, we excluded patients that had been out of work for more than two years.  
18  
19 Long-term absence from work due to illness has been identified as a risk factor for transition  
20  
21 into disability pension (52, 53). Seventy-one per cent of the patients in our study had paid  
22  
23 work. Previous studies have shown that nonworking FM patients have more severe symptoms  
24  
25 than working patients (54, 55). Despite the high number of workers in our study, the patients  
26  
27 reported high symptoms burden, in terms of pain, fatigue and psychological distress.  
28  
29

30  
31 Because we assumed that higher age might be associated with more comorbid  
32  
33 conditions, we defined 50 years as the upper age limit for inclusion. Nevertheless, the median  
34  
35 number of comorbidities in the included patients was two.  
36  
37

38  
39 Although we intended to capture patients with FM at an early stage of their disease,  
40  
41 the included patients reported median symptoms duration of eight years. These findings,  
42  
43 although contrary to our expectations, corresponds to other studies, which have shown that  
44  
45 patients wait a significant time before presenting symptoms to a physician (56). Further, there  
46  
47 may be a delay in diagnosis in primary health care due to an overlap of symptoms with other  
48  
49 conditions and patients may have difficulties in communicating their symptoms (57). Other  
50  
51 reasons for the delay in diagnosis and treatment may be lack of knowledge and understanding  
52  
53 of FM from primary care physicians (58).  
54  
55

56  
57 This study was conducted according to a predefined published protocol (23). It was  
58  
59 well-powered, and all included patients were allocated to the groups to which they were  
60

1  
2  
3 randomised, ensuring valid treatment comparisons and assessment of treatment effects (59).  
4  
5 The losses to follow-up were within our assumption of 10 %. We had predefined that patients  
6  
7 needed to attend at least 50 per cent of the sessions to expect effects of the VTP intervention,  
8  
9 and nearly 90 per cent attended more than half of the VTP sessions (23). This attendance rate  
10  
11 is comparable to other studies on mindfulness- and acceptance-based interventions (13). The  
12  
13 percentage of patients with complete follow-up data was high. The VTP facilitators were  
14  
15 certified and followed a manualised programme, which improves transparency and replication  
16  
17 (60). Moreover, the 12 months follow-up time was relatively long, and in line with what has  
18  
19 been asked for in previous research (13).  
20  
21  
22  
23  
24

25 Several limitations need to be mentioned. Firstly, before randomisation, all study  
26  
27 participants received a short patient education session, which is recommended as a first-line  
28  
29 intervention by the EULAR recommendations. This might have served as a validation of the  
30  
31 FM diagnosis and may have provided the patients with knowledge and information about  
32  
33 possible coping strategies. The control group could include strategies and activities at their  
34  
35 own initiative. We did not monitor the content of ‘treatment as usual’ in the control group  
36  
37 other than physical activity. Thus, we do not know if the patients had initiated beneficial self-  
38  
39 management strategies during the control period.  
40  
41  
42  
43

44 Secondly, our study was a pragmatic randomised controlled trial, which makes it  
45  
46 difficult to differentiate between the effects of the various interventions and to interpret the  
47  
48 lack of effects. Moreover, we did not monitor the adherence to the homework between the  
49  
50 VTP sessions. Consequently, we do not know to what extent the patients practised  
51  
52 mindfulness training and integrated the training in their daily life. A recent review on  
53  
54 mindfulness- and acceptance-based interventions showed a small but significant association  
55  
56 between the extent of formal practice and positive intervention outcomes (61). It is  
57  
58 recommended that future research should adopt a standardised approach for monitoring home-  
59  
60

1  
2  
3 practice across mindfulness- and acceptance-based interventions (62). Further, we included  
4 already existing HLCs in the communities. The activities offered vary between centres, and  
5  
6 consequently, it was not possible to standardise the frequency, intensity, duration, progression  
7  
8 or type of exercise. Moreover, the HLCs offer physical activity counselling at daytime only,  
9  
10 making the intervention challenging to combine with a daytime job. Subsequently, a physical  
11  
12 activity intervention with more flexible access might have increased the patient participation.  
13  
14  
15  
16

17  
18 Thirdly, we did not include any coping measures, such as self-efficacy, to assess the  
19  
20 coping with their symptoms. We used the GHQ-12 to assess mental health status because this  
21  
22 was found to be sensitive to change in previous studies on the VTP. The GHQ-12 does not  
23  
24 capture more severe symptoms of depression and anxiety but is a widely used instrument to  
25  
26 assess psychological distress.  
27  
28  
29

30  
31 Finally, we could have applied other statistical analyses, such as Linear Mixed Models  
32  
33 rather than ANCOVA, to estimate effects. However, ANCOVA was chosen because it has  
34  
35 shown great power and low variability when compared to other traditional analyses  
36  
37 approaches, and it is regarded as a preferred analysis when post-treatment assessments  
38  
39 adjusted for the pre-treatment assessments are measured (63, 64). We did not adjust for  
40  
41 multiple comparisons.  
42  
43  
44

45  
46 This study has demonstrated that a multicomponent rehabilitation programme  
47  
48 combining recent diagnosis and patient education with a mindfulness- and acceptance-based  
49  
50 intervention followed by physical activity counselling was not more effective than recent  
51  
52 diagnosis, patient education and treatment as usual for patients with FM.  
53

54  
55 There was a high drop-out rate from the physical activity intervention. Further, studies  
56  
57 on how to adapt and tailor physical activity interventions to patients with FM are needed.  
58  
59  
60

1  
2  
3 Our intention to include patients at an early stage of the disease was not fulfilled. The  
4  
5 patients reported high symptoms burden and had a median symptoms duration of eight year.  
6  
7 Thus, future research should aim at including patients with more recent disease onset and  
8  
9 explore the effects of prompt diagnosis and patient education.  
10  
11  
12  
13

14 **Author contributions:** Kåre Birger Hagen and Heidi A. Zangi contributed to the initial  
15  
16 design of the project, and all authors contributed to the conception of the study. Material  
17  
18 preparation, data collection and analysis were performed by Trond Haugmark, Sella A.  
19  
20 Provan and Geir Smedslund. All authors contributed to the interpretation of the data. The first  
21  
22 draft of the manuscript was written by Trond Haugmark and all authors commented and  
23  
24 revised previous versions of the manuscript. All authors read and approved the final  
25  
26 manuscript.  
27  
28  
29

30  
31 **Conflicts of interest:** The authors declare that they have no conflict of interest.  
32  
33

34 **Funding:** This work was supported by the Norwegian South-Eastern Regional Health  
35  
36 Authority (grant number 2016015).  
37  
38

39 **Data sharing:** No additional data available  
40  
41  
42  
43  
44  
45  
46  
47  
48  
49  
50  
51  
52  
53  
54  
55  
56  
57  
58  
59  
60

## References

1. Wolfe F, Clauw DJ, Fitzcharles M-A, Goldenberg DL, Katz RS, Mease P, et al. The American College of Rheumatology Preliminary Diagnostic Criteria for Fibromyalgia and Measurement of Symptom Severity. *Arthritis Care & Research*. 2010;62(5):600-10.
2. Walitt B, Nahin RL, Katz RS, Bergman MJ, Wolfe F. The Prevalence and Characteristics of Fibromyalgia in the 2012 National Health Interview Survey. *PLOS ONE*. 2015;10(9):e0138024.
3. Clauw DJ. Fibromyalgia: An Overview. *The American Journal of Medicine*. 2009;122(12, Supplement):S3-S13.
4. Macfarlane GJ, Kronisch C, Dean LE, Atzeni F, Hauser W, Flus E, et al. EULAR revised recommendations for the management of fibromyalgia. *Annals of the Rheumatic Diseases*. 2017;76(2):318-28.
5. Verbunt JA, Pernot DH, Smeets RJ. Disability and quality of life in patients with fibromyalgia. 2008;6(1):8.
6. Marques AP, Santo ADSDE, Berssaneti AA, Matsutani LA, Yuan SLK. Prevalence of fibromyalgia: literature review update. *Revista Brasileira de Reumatologia (English Edition)*. 2017;57(4):356-63.
7. Hayes SM. Fibromyalgia and the therapeutic relationship: Where uncertainty meets attitude. *Pain Res Manage*. 2010;15.
8. Armentor JL. Living With a Contested, Stigmatized Illness: Experiences of Managing Relationships Among Women With Fibromyalgia. *Qual Health Res*. 2017;27(4):462-73.
9. Nuesch E, Hauser W, Bernardy K, Barth J, Juni P. Comparative efficacy of pharmacological and non-pharmacological interventions in fibromyalgia syndrome: network meta-analysis. *Annals of the Rheumatic Diseases [Internet]*. 2013; 72(6):[955-62 pp.].
10. Hauser W, Bernardy K, Arnold B, Offenbacher M, Schiltenwolf M. Efficacy of multicomponent treatment in fibromyalgia syndrome: a meta-analysis of randomized controlled clinical trials (Structured abstract). *Arthritis and Rheumatism (Arthritis Care and Research) [Internet]*. 2009; 61(2):[216-24 pp.].
11. Lauche R, Cramer H, Dobos G, Langhorst J, Schmidt S. A systematic review and meta-analysis of mindfulness-based stress reduction for the fibromyalgia syndrome *Journal of Psychosomatic Research [Internet]*. 2013; 75(6):[500-10 pp.].
12. Bernardy K, Klose P, Welsch P, Häuser W. Efficacy, acceptability and safety of cognitive behavioural therapies in fibromyalgia syndrome – A systematic review and meta-analysis of randomized controlled trials. *European Journal of Pain*. 2018;22(2):242-60.
13. Haugmark T, Hagen KB, Smedslund G, Zangi HA. Mindfulness- and acceptance-based interventions for patients with fibromyalgia – A systematic review and meta-analyses. *PLOS ONE*. 2019;14(9):e0221897.
14. Bidonde J, Busch AJ, Webber SC, Schachter CL, Danyliw A, Overend TJ, et al. Aquatic exercise training for fibromyalgia. *Cochrane Database of Systematic Reviews*. 2014(10).
15. Bidonde J, Busch AJ, Bath B, Milosavljevic S. Exercise for adults with fibromyalgia: an umbrella systematic review with synthesis of best evidence. *Current Rheumatology Reviews*. 2014;10(1):45-79.
16. Hauser W, Klose P, Langhorst J, Moradi B, Steinbach M, Schiltenwolf M, et al. Efficacy of different types of aerobic exercise in fibromyalgia syndrome: a systematic review and meta-analysis of randomised controlled trials (Provisional abstract). *Arthritis Research and Therapy [Internet]*. 2010; 12(3).

17. Perrot S, Russell IJ. More ubiquitous effects from non-pharmacologic than from pharmacologic treatments for fibromyalgia syndrome: A meta-analysis examining six core symptoms. *European Journal of Pain*. 2014;18(8):1067-80.
18. Bidonde J, Busch AJ, Schachter CL, Webber SC, Musselman KE, Overend TJ, et al. Mixed exercise training for adults with fibromyalgia. *Cochrane Database of Systematic Reviews*. 2019(5).
19. Haugli L, Steen E, Laerum E, Nygard R, Finset A. Learning to have less pain - is it possible? A one-year follow-up study of the effects of a personal construct group learning programme on patients with chronic musculoskeletal pain. *Patient Educ Couns*. 2001;45(2):111-8.
20. Zangi HA, Mowinckel P, Finset A, Eriksson LR, Hoystad TO, Lunde AK, et al. A mindfulness-based group intervention to reduce psychological distress and fatigue in patients with inflammatory rheumatic joint diseases: a randomised controlled trial. *Ann Rheum Dis*. 2012;71(6):911-7.
21. Zangi HA, Finset A, Steen E, Mowinckel P, Hagen KB. The effects of a vitality training programme on psychological distress in patient with inflammatory rheumatic diseases and fibromyalgia: a 1-year follow-up. *Scand J Rheumatol*. 2009;38:231-4.
22. Zangi HA, Hauge M-I, Steen E, Finset A, Hagen KB. "I am not only a disease, I am so much more". Patients with rheumatic diseases' experiences of an emotion-focused group intervention. *Patient education and counseling*. 2011;85(3):419-24.
23. Haugmark T, Hagen KB, Provan SA, Baerheim E, Zangi HA. Effects of a community-based multicomponent rehabilitation programme for patients with fibromyalgia: protocol for a randomised controlled trial. *BMJ Open*. 2018;8(6):e021004.
24. Craig P, Dieppe P, Macintyre S, Michie S, Nazareth I, Petticrew M. Developing and evaluating complex interventions: the new Medical Research Council guidance. *BMJ*. 2008;337.
25. Moher D, Hopewell S, Schulz KF, Montori V, Gøtzsche PC, Devereaux PJ, et al. CONSORT 2010 Explanation and Elaboration: updated guidelines for reporting parallel group randomised trials. *Journal of Clinical Epidemiology*. 2010;63(8):e1-e37.
26. Wolfe F, Clauw DJ, Fitzcharles MA, Goldenberg DL, Hauser W, Katz RL, et al. 2016 Revisions to the 2010/2011 fibromyalgia diagnostic criteria. *Semin Arthritis Rheum*. 2016.
27. Kabat-Zinn J. *Full Catastrophe Living: Using the Wisdom of Your Body and Mind to Face Stress, Pain and Illness*. New York.: Delacorte; 2013.
28. Steen E, Haugli L. The body has a history: an educational intervention programme for people with generalised chronic musculoskeletal pain. *Patient Educ Couns*. 2000;41(2):181-95.
29. Lundahl B, Burke BL. The effectiveness and applicability of motivational interviewing: a practice-friendly review of four meta-analyses. *J Clin Psychol*. 2009;65(11):1232-45.
30. Mease PJ, Clauw DJ, Christensen R, Crofford LJ, Gendreau RM, Martin SA, et al. Toward development of a fibromyalgia responder index and disease activity score: OMERACT module update. *J Rheumatol*. 2011;38(7):1487-95.
31. Choy EH, Arnold LM, Clauw D, Crofford L, Glass JM, Simon L, et al. Content and Criterion Validity of The Preliminary Core Dataset for Clinical Trials in Fibromyalgia Syndrome. *The Journal of rheumatology*. 2009;36(10):2330-4.
32. Beasley M, Prescott GJ, Scotland G, McBeth J, Lovell K, Keeley P, et al. Patient-reported improvements in health are maintained 2 years after completing a short course of cognitive behaviour therapy, exercise or both treatments for chronic widespread pain: long-term results from the MUSICIAN randomised controlled trial. *RMD Open*. 2015;1(1):e000026.

- 1
- 2
- 3 33. Rampakakis E, Ste-Marie PA, Sampalis JS, Karellis A, Shir Y, Fitzcharles MA. Real-
- 4 life assessment of the validity of patient global impression of change in fibromyalgia. *RMD*
- 5 *Open*. 2015;1(1):e000146.
- 6 34. McBeth J, Prescott G, Scotland G, Lovell K, Keeley P, Hannaford P, et al. Cognitive
- 7 behavior therapy, exercise, or both for treating chronic widespread pain. *Arch Intern Med*.
- 8 2012;172(1):48-57.
- 9 35. Kamper SJ, Maher CG, Mackay G. Global rating of change scales: a review of
- 10 strengths and weaknesses and considerations for design. *J Man Manip Ther*. 2009;17(3):163-
- 11 70.
- 12 36. Malt UF, Mogstad TE, Refnin IB. Goldberg's General Health Questionnaire. *Tidsskr*
- 13 *Nor Laegeforen*. 1989;109(13):1391-4.
- 14 37. Nerdrum P, Geirdal AØ. Psychological Distress among Young Norwegian Health
- 15 Professionals. *Professions and Professionalism*. 2014;4(No 1).
- 16 38. Goldberg D, Williams P. *A User's Guide to the General Health Questionnaire (GHQ)*.
- 17 Windsor (UK): NFER Nelson Publishing Company; 1988.
- 18 39. Dundas I, Vøllestad J, Binder P-E, Sivertsen B. The Five Factor Mindfulness
- 19 Questionnaire in Norway. *Scandinavian Journal of Psychology*. 2013(54):250-60.
- 20 40. Kurtze N, Rangul V, Hustvedt BE, Flanders WD. Reliability and validity of self-
- 21 reported physical activity in the Nord-Trøndelag Health Study: HUNT 1. *Scand J Public*
- 22 *Health*. 2008;36(1):52-61.
- 23 41. Gecht MR, Connell KJ, Sinacore JM, Prohaska TR. A survey of exercise beliefs and
- 24 exercise habits among people with arthritis. *Arthritis Care Res*. 1996;9(2):82-8.
- 25 42. Reilly MC, Gooch KL, Wong RL, Kupper H, van der Heijde D. Validity, reliability
- 26 and responsiveness of the Work Productivity and Activity Impairment Questionnaire in
- 27 ankylosing spondylitis. *Rheumatology (Oxford)*. 2010;49(4):812-9.
- 28 43. Janssen MF, Pickard AS, Golicki D, Gudex C, Niewada M, Scalone L, et al.
- 29 Measurement properties of the EQ-5D-5L compared to the EQ-5D-3L across eight patient
- 30 groups: a multi-country study. *Quality of Life Research*. 2013;22(7):1717-27.
- 31 44. Obradovic M, Lal A, Liedgens H. Validity and responsiveness of EuroQol-5
- 32 dimension (EQ-5D) versus Short Form-6 dimension (SF-6D) questionnaire in chronic pain.
- 33 *Health Qual Life Outcomes*. 2013;11:110.
- 34 45. StataCorp. *Stata Statistical Software*. 14 ed. Texas, USA: StataCorp LP; 2015.
- 35 46. Dundas I, Vøllestad J, Binder P-E, Sivertsen B. The Five Factor Mindfulness
- 36 Questionnaire in Norway. *Scandinavian Journal of Psychology*. 2013;54(3):250-60.
- 37 47. Baer RA, Carmody J, Hunsinger M. Weekly Change in Mindfulness and Perceived
- 38 Stress in a Mindfulness-Based Stress Reduction Program. *Journal of Clinical Psychology*.
- 39 2012;68(7):755-65.
- 40 48. O'Dwyer T, Maguire S, Mockler D, Durcan L, Wilson F. Behaviour change
- 41 interventions targeting physical activity in adults with fibromyalgia: a systematic review.
- 42 *Rheumatology International*. 2019;39(5):805-17.
- 43 49. Álvarez-Gallardo IC, Bidonde J, Busch A, Westby M, Kenny GP, Delgado-Fernández
- 44 M, et al. Therapeutic validity of exercise interventions in the management of fibromyalgia. *J*
- 45 *Sports Med Phys Fitness*. 2019;59(5):828-38.
- 46 50. Richards SC, Scott DL. Prescribed exercise in people with fibromyalgia: parallel
- 47 group randomised controlled trial. *Bmj*. 2002;325(7357):185.
- 48 51. Estévez-López F, Maestre-Cascales C, Russell D, Álvarez-Gallardo IC, Rodríguez-
- 49 Ayllon M, Hughes CM, et al. Effectiveness of Exercise on Fatigue and Sleep Quality in
- 50 Fibromyalgia: A Systematic Review and Meta-analysis of Randomized Trials. *Archives of*
- 51 *Physical Medicine and Rehabilitation*. 2020.
- 52
- 53
- 54
- 55
- 56
- 57
- 58
- 59
- 60

- 1  
2  
3 52. Gjesdal S, Bratberg E. Diagnosis and duration of sickness absence as predictors for  
4 disability pension: results from a three-year, multi-register based\* and prospective study.  
5 *Scand J Public Health*. 2003;31(4):246-54.  
6  
7 53. Virtanen M, Kivimäki M, Vahtera J, Elovainio M, Sund R, Virtanen P, et al. Sickness  
8 absence as a risk factor for job termination, unemployment, and disability pension among  
9 temporary and permanent employees. *Occupational and Environmental Medicine*.  
10 2006;63(3):212-7.  
11 54. Palstam A, Mannerkorpi K. Work Ability in Fibromyalgia: An Update in the 21st  
12 Century. *Current rheumatology reviews*. 2017;13(3):180-7.  
13 55. Henriksson CM, Liedberg GM, Gerdle B. Women with fibromyalgia: Work and  
14 rehabilitation. *Disability and Rehabilitation*. 2005;27(12):685-94.  
15 56. Gendelman O, Amital H, Bar-On Y, Ben-Ami Shor D, Amital D, Tiosano S, et al.  
16 Time to diagnosis of fibromyalgia and factors associated with delayed diagnosis in primary  
17 care. *Best Pract Res Clin Rheumatol*. 2018;32(4):489-99.  
18 57. Golden A, D'Arcy Y, Masters ET, Clair A. Living with fibromyalgia: results from the  
19 functioning with fibro survey highlight patients' experiences and relationships with health  
20 care providers. *Nursing: Research and Reviews*. 2015;5:109-17.  
21 58. Choy E, Perrot S, Leon T, Kaplan J, Petersel D, Ginovker A, et al. A patient survey of  
22 the impact of fibromyalgia and the journey to diagnosis. *BMC Health Services Research*.  
23 2010;10(1):102.  
24 59. Armijo-Olivo S, Warren S, Magee D. Intention to treat analysis, compliance, drop-  
25 outs and how to deal with missing data in clinical research: a review. *Physical Therapy*  
26 *Reviews*. 2009;14(1):36-49.  
27 60. Hoffmann TC, Glasziou PP, Boutron I, Milne R, Perera R, Moher D, et al. Better  
28 reporting of interventions: template for intervention description and replication (TIDieR)  
29 checklist and guide. *BMJ*. 2014;348(mar07 3):g1687-g.  
30 61. Parsons CE, Crane C, Parsons LJ, Fjorback LO, Kuyken W. Home practice in  
31 Mindfulness-Based Cognitive Therapy and Mindfulness-Based Stress Reduction: A  
32 systematic review and meta-analysis of participants' mindfulness practice and its association  
33 with outcomes. *Behaviour Research and Therapy*. 2017;95:29-41.  
34 62. Lloyd A, White R, Eames C, Crane R. The Utility of Home-Practice in Mindfulness-  
35 Based Group Interventions: A Systematic Review. *Mindfulness*. 2018;9(3):673-92.  
36 63. O'Connell NS, Dai L, Jiang Y, Speiser JL, Ward R, Wei W, et al. Methods for  
37 Analysis of Pre-Post Data in Clinical Research: A Comparison of Five Common Methods. *J*  
38 *Biom Biostat*. 2017;8(1):1-8.  
39 64. Valente MJ, MacKinnon DP. Comparing models of change to estimate the mediated  
40 effect in the pretest-posttest control group design. *Struct Equ Modeling*. 2017;24(3):428-50.  
41  
42  
43  
44  
45  
46  
47  
48  
49  
50  
51  
52  
53  
54  
55  
56  
57  
58  
59  
60



1  
2  
3 **Acknowledgement:** The authors would like to acknowledge and thank the patients who have  
4 participated and contributed in this study. We would also thank Oddfrid Nesse, Ingrid Helle  
5 Trana, Ann-Grete Dybvik Akre, Ida Sjørbotten, Linda Ann Rørkoll, Ingunn Tveit Nafstad,  
6 Bente Dreiem Løken, Marianne Iversen Mejia and Iren Folkem for having facilitated the  
7 Vitality Training groups. Further, we thank the Healthy Life Centers in Ullensaker, Eidsvoll,  
8 Nannestad, Hurdal, Gjerdrum, Nes, Oslo and Bærum. Finally, we want to thank the service  
9 user, Astrid Kristine Andreassen.  
10  
11  
12  
13  
14  
15  
16  
17  
18  
19

20 **Ethical approval:** This study was performed in line with the principals of the Declaration of  
21 Helsinki. Study design, information strategy, written consent formula and data security are  
22 approved by the Regional Committee for Medical and Health Research Ethics  
23 (2015/2447/REK sør-øst A).  
24  
25  
26  
27  
28  
29

30 **Consent to participate:** Informed consent was obtained from all individual patients included  
31 in the study.  
32  
33  
34  
35  
36  
37  
38  
39  
40  
41  
42  
43  
44  
45  
46  
47  
48  
49  
50  
51  
52  
53  
54  
55  
56  
57  
58  
59  
60

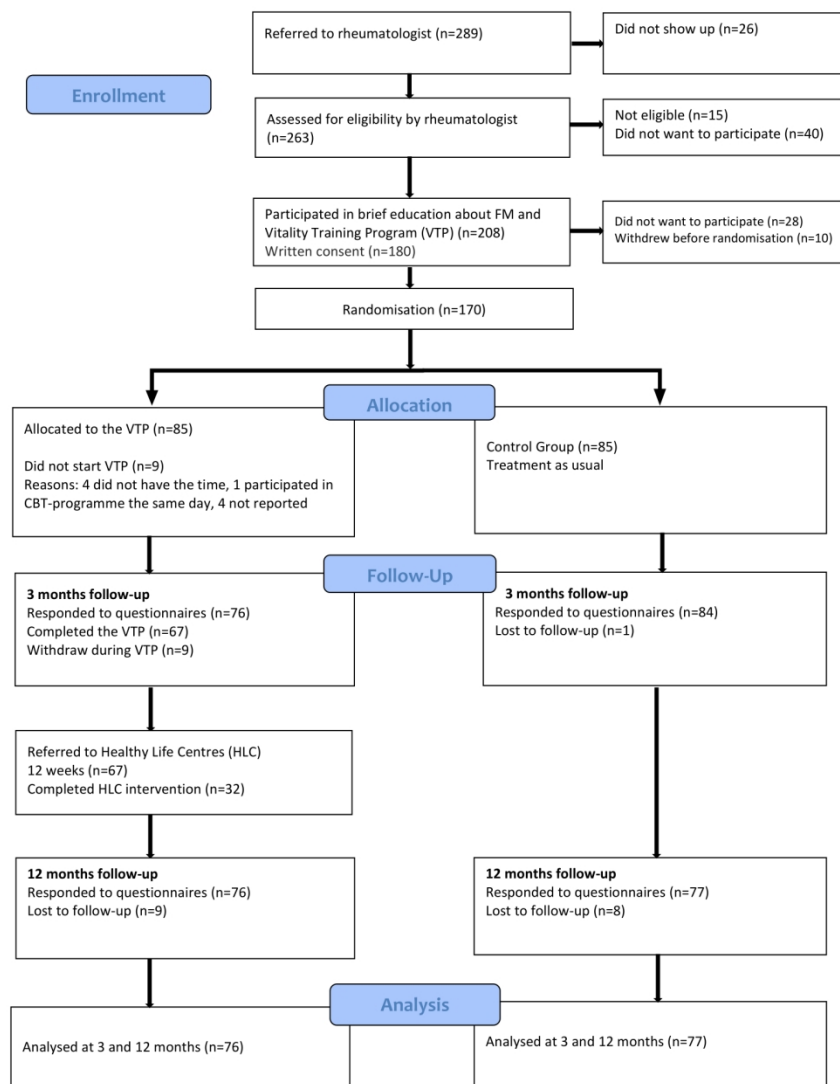

Figure 1. Flow chart of patients

599x776mm (72 x 72 DPI)

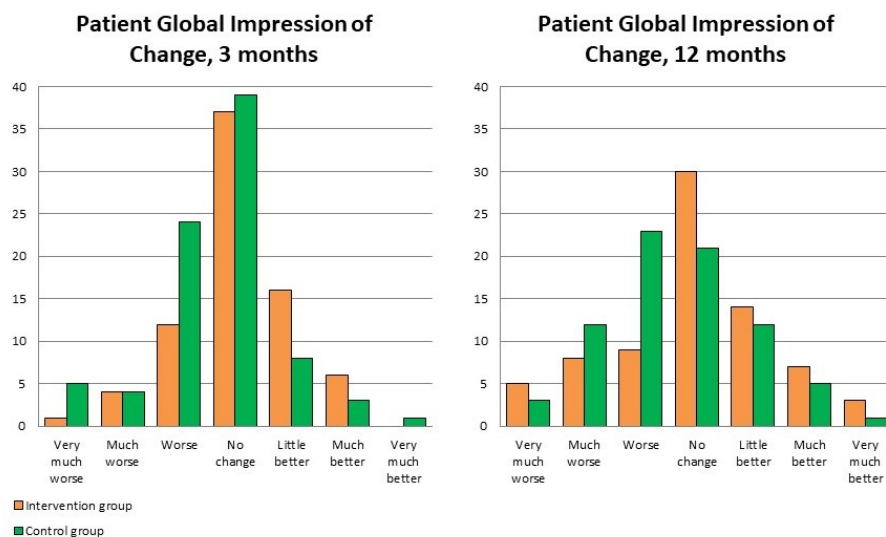

Figure 2. The distribution of PGIC scores

252x150mm (96 x 96 DPI)

## Supplementary file

### *Online Supplementary file 1*

#### Example from group session 6 in the Vitality Training Programme: Anger

The first part of the program is standard in all sessions: Participants are invited to share their reflection on experiences from home exercises after the previous session in groups of three to four persons. They are encouraged to read their reflective diaries for each other and to share and listen with an open, non-judgmental attitude without discussing or giving advice. Next, participants are invited to take part in an awareness exercise instructed by one of the group facilitators. They are guided to attend to their thoughts, feelings and bodily senses in the present moment with openness, acceptance and curiosity. After the exercise, they are invited to share their experiences with one other person in the group. In the next part of the session, the group facilitators introduce the topic "anger" by giving a short introduction about relationship between chronic illness and emotions and the purpose of addressing emotions. The participants are then invited to take part in an exercise with awareness of anger, introduced by one of the facilitators: "Think of the word anger... or to be angry. Notice what you become aware of... thoughts, maybe concrete situations, perhaps memories from the past... Are the situations that you become aware of new or old? Maybe both?... What do you experience in your body right now when you think of anger or being angry?... Also note whether the word anger or being angry evokes any other feelings..." Awareness of anger is continued in movement to music. The music allows participants to express anger with their body, and they are invited to let their bodies do what they want to do while listening to the music. Then, written hypothetical sentences are used to enhance discovery to tacit knowledge, for example: "If there are any other emotions related to my feeling of anger, it must be..." Participants are further invited to share and reflect upon experiences and discoveries from the exercise in small groups and in a plenary session. The next exercise is a guided imagery intending to help individuals connect to their experiences of anger in the present moment, and to explore its meaning. Further, crayons and white paper are used to draw an image of anger as experienced here and now. Again, participants are invited to share and reflect in small groups and in plenary, with focus on new discoveries and the consequences of these discoveries from the participants' daily life. Finally, they write a diary about their experiences from the whole session. Before closing the session, participants are asked to be aware of how they relate both to their own anger and anger from others in their daily lives. They are provided with guided mindfulness audio files and are encouraged to practice these exercises in everyday life and to train awareness in daily activities. They are asked to write reflective diaries about their thoughts, emotions and bodily senses.

Each session follows the same structure with exercise adapted to the particular topic. The group facilitators are health professionals, such as nurses and physiotherapists, and certified through a one-year university training programme (30 credits) at VID Specialized University in Oslo.

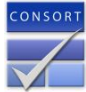

## CONSORT 2010 checklist of information to include when reporting a randomised trial\*

| Section/Topic                    | Item No | Checklist item                                                                                                                                                                              | Reported on page No |
|----------------------------------|---------|---------------------------------------------------------------------------------------------------------------------------------------------------------------------------------------------|---------------------|
| <b>Title and abstract</b>        |         |                                                                                                                                                                                             |                     |
|                                  | 1a      | Identification as a randomised trial in the title                                                                                                                                           | 1                   |
|                                  | 1b      | Structured summary of trial design, methods, results, and conclusions (for specific guidance see CONSORT for abstracts)                                                                     | 2,3                 |
| <b>Introduction</b>              |         |                                                                                                                                                                                             |                     |
| Background and objectives        | 2a      | Scientific background and explanation of rationale                                                                                                                                          | 4,5                 |
|                                  | 2b      | Specific objectives or hypotheses                                                                                                                                                           | 5                   |
| <b>Methods</b>                   |         |                                                                                                                                                                                             |                     |
| Trial design                     | 3a      | Description of trial design (such as parallel, factorial) including allocation ratio                                                                                                        | 6                   |
|                                  | 3b      | Important changes to methods after trial commencement (such as eligibility criteria), with reasons                                                                                          | NA                  |
| Participants                     | 4a      | Eligibility criteria for participants                                                                                                                                                       | 6                   |
|                                  | 4b      | Settings and locations where the data were collected                                                                                                                                        | 6,7                 |
| Interventions                    | 5       | The interventions for each group with sufficient details to allow replication, including how and when they were actually administered                                                       | 6,7                 |
| Outcomes                         | 6a      | Completely defined pre-specified primary and secondary outcome measures, including how and when they were assessed                                                                          | 8,9,10              |
|                                  | 6b      | Any changes to trial outcomes after the trial commenced, with reasons                                                                                                                       | NA                  |
| Sample size                      | 7a      | How sample size was determined                                                                                                                                                              | 10                  |
|                                  | 7b      | When applicable, explanation of any interim analyses and stopping guidelines                                                                                                                | NA                  |
| <b>Randomisation:</b>            |         |                                                                                                                                                                                             |                     |
| Sequence generation              | 8a      | Method used to generate the random allocation sequence                                                                                                                                      | 10                  |
|                                  | 8b      | Type of randomisation; details of any restriction (such as blocking and block size)                                                                                                         | 10                  |
| Allocation concealment mechanism | 9       | Mechanism used to implement the random allocation sequence (such as sequentially numbered containers), describing any steps taken to conceal the sequence until interventions were assigned | 10                  |
| Implementation                   | 10      | Who generated the random allocation sequence, who enrolled participants, and who assigned participants to interventions                                                                     | 10                  |
| Blinding                         | 11a     | If done, who was blinded after assignment to interventions (for example, participants, care providers, those                                                                                | 10                  |

|    |                          |                                                                                                                     |       |
|----|--------------------------|---------------------------------------------------------------------------------------------------------------------|-------|
| 1  |                          | assessing outcomes) and how                                                                                         |       |
| 2  |                          | 11b If relevant, description of the similarity of interventions                                                     | NA    |
| 3  | Statistical methods      | 12a Statistical methods used to compare groups for primary and secondary outcomes                                   | 10,11 |
| 4  |                          | 12b Methods for additional analyses, such as subgroup analyses and adjusted analyses                                | NA    |
| 5  |                          |                                                                                                                     |       |
| 6  | <b>Results</b>           |                                                                                                                     |       |
| 7  | Participant flow (a      | 13a For each group, the numbers of participants who were randomly assigned, received intended treatment, and        | 12    |
| 8  | diagram is strongly      | were analysed for the primary outcome                                                                               |       |
| 9  | recommended)             | 13b For each group, losses and exclusions after randomisation, together with reasons                                | 12    |
| 10 | Recruitment              | 14a Dates defining the periods of recruitment and follow-up                                                         | 12    |
| 11 |                          | 14b Why the trial ended or was stopped                                                                              | 12    |
| 12 | Baseline data            | 15 A table showing baseline demographic and clinical characteristics for each group                                 | 12    |
| 13 | Numbers analysed         | 16 For each group, number of participants (denominator) included in each analysis and whether the analysis was      | 12    |
| 14 |                          | by original assigned groups                                                                                         |       |
| 15 | Outcomes and             | 17a For each primary and secondary outcome, results for each group, and the estimated effect size and its           | 13    |
| 16 | estimation               | precision (such as 95% confidence interval)                                                                         |       |
| 17 |                          | 17b For binary outcomes, presentation of both absolute and relative effect sizes is recommended                     | NA    |
| 18 | Ancillary analyses       | 18 Results of any other analyses performed, including subgroup analyses and adjusted analyses, distinguishing       | NA    |
| 19 |                          | pre-specified from exploratory                                                                                      |       |
| 20 | Harms                    | 19 All important harms or unintended effects in each group (for specific guidance see CONSORT for harms)            | 14    |
| 21 |                          |                                                                                                                     |       |
| 22 | <b>Discussion</b>        |                                                                                                                     |       |
| 23 | Limitations              | 20 Trial limitations, addressing sources of potential bias, imprecision, and, if relevant, multiplicity of analyses | 18    |
| 24 | Generalisability         | 21 Generalisability (external validity, applicability) of the trial findings                                        | 15-17 |
| 25 | Interpretation           | 22 Interpretation consistent with results, balancing benefits and harms, and considering other relevant evidence    | 15-19 |
| 26 |                          |                                                                                                                     |       |
| 27 | <b>Other information</b> |                                                                                                                     |       |
| 28 | Registration             | 23 Registration number and name of trial registry                                                                   | 3     |
| 29 | Protocol                 | 24 Where the full trial protocol can be accessed, if available                                                      | 3     |
| 30 | Funding                  | 25 Sources of funding and other support (such as supply of drugs), role of funders                                  | 24    |

36  
37 \*We strongly recommend reading this statement in conjunction with the CONSORT 2010 Explanation and Elaboration for important clarifications on all the items. If relevant, we also  
38 recommend reading CONSORT extensions for cluster randomised trials, non-inferiority and equivalence trials, non-pharmacological treatments, herbal interventions, and pragmatic trials.  
39 Additional extensions are forthcoming: for those and for up to date references relevant to this checklist, see [www.consort-statement.org](http://www.consort-statement.org).  
40  
41  
42
